# Supplementary material for: Contamination and washing of cloth masks and risk of infection among hospital health workers in Vietnam: a post hoc analysis of a randomised controlled trial
Source: PubMed Central journal article supplement — BMJ Open. 2020 Sep 28;10(9):e042045. doi: 10.1136/bmjopen-2020-042045 (PMC7523194; doi:10.1136/bmjopen-2020-042045), 2020-09-28
Supplement: bmjopen-2020-042045.draft_revisions.pdf [file bmjopen-2020-042045.draft_revisions.pdf]

# BMJ Open

BMJ Open is committed to open peer review. As part of this commitment we make the peer review history of every article we publish publicly available.

When an article is published we post the peer reviewers' comments and the authors' responses online. We also post the versions of the paper that were used during peer review. These are the versions that the peer review comments apply to.

The versions of the paper that follow are the versions that were submitted during the peer review process. They are not the versions of record or the final published versions. They should not be cited or distributed as the published version of this manuscript.

BMJ Open is an open access journal and the full, final, typeset and author-corrected version of record of the manuscript is available on our site with no access controls, subscription charges or pay-per-view fees (<http://bmjopen.bmj.com>).

If you have any questions on BMJ Open's open peer review process please email [info.bmjopen@bmj.com](mailto:info.bmjopen@bmj.com)

# BMJ Open

## Washing of cloth masks and the relationship to respiratory infection risk in health workers

|                               |                                                                                                                                                                                                                                                                                                                                                                                                                                                                                                                   |
|-------------------------------|-------------------------------------------------------------------------------------------------------------------------------------------------------------------------------------------------------------------------------------------------------------------------------------------------------------------------------------------------------------------------------------------------------------------------------------------------------------------------------------------------------------------|
| Journal:                      | <i>BMJ Open</i>                                                                                                                                                                                                                                                                                                                                                                                                                                                                                                   |
| Manuscript ID                 | bmjopen-2020-042045                                                                                                                                                                                                                                                                                                                                                                                                                                                                                               |
| Article Type:                 | Original research                                                                                                                                                                                                                                                                                                                                                                                                                                                                                                 |
| Date Submitted by the Author: | 24-Jun-2020                                                                                                                                                                                                                                                                                                                                                                                                                                                                                                       |
| Complete List of Authors:     | MacIntyre, C Raina; University of New South Wales, The Kirby Institute; Arizona State University, College of Public Affairs and Community Solutions<br>Dung, Tham; Ministry of Health, Vietnam<br>Chughtai, Abrar; University of New South Wales, School of Public Health and Community Medicine<br>Seale, Holly; University of New South Wales, School of Public Health and Community Medicine<br>Rahman, Bayzidur; School of Public Health and Community Medicine, UNSW Medicine, University of New South Wales |
| Keywords:                     | INFECTIOUS DISEASES, Infection control < INFECTIOUS DISEASES, Respiratory infections < THORACIC MEDICINE                                                                                                                                                                                                                                                                                                                                                                                                          |
|                               |                                                                                                                                                                                                                                                                                                                                                                                                                                                                                                                   |

SCHOLARONE™  
Manuscripts

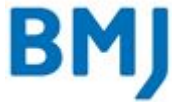

I, the Submitting Author has the right to grant and does grant on behalf of all authors of the Work (as defined in the below author licence), an exclusive licence and/or a non-exclusive licence for contributions from authors who are: i) UK Crown employees; ii) where BMJ has agreed a CC-BY licence shall apply, and/or iii) in accordance with the terms applicable for US Federal Government officers or employees acting as part of their official duties; on a worldwide, perpetual, irrevocable, royalty-free basis to BMJ Publishing Group Ltd ("BMJ") its licensees and where the relevant Journal is co-owned by BMJ to the co-owners of the Journal, to publish the Work in this journal and any other BMJ products and to exploit all rights, as set out in our [licence](#).

The Submitting Author accepts and understands that any supply made under these terms is made by BMJ to the Submitting Author unless you are acting as an employee on behalf of your employer or a postgraduate student of an affiliated institution which is paying any applicable article publishing charge ("APC") for Open Access articles. Where the Submitting Author wishes to make the Work available on an Open Access basis (and intends to pay the relevant APC), the terms of reuse of such Open Access shall be governed by a Creative Commons licence – details of these licences and which [Creative Commons](#) licence will apply to this Work are set out in our licence referred to above.

Other than as permitted in any relevant BMJ Author's Self Archiving Policies, I confirm this Work has not been accepted for publication elsewhere, is not being considered for publication elsewhere and does not duplicate material already published. I confirm all authors consent to publication of this Work and authorise the granting of this licence.

## Washing of cloth masks and the relationship to respiratory infection risk in health workers

### Authors

Chandini Raina MacIntyre(1)

Tham Chi Dung (2)

Abrar Ahmad Chughtai(3)

Holly Seale(3)

Md Bayzidur Rahman(3)

1. Biosecurity Program, The Kirby Institute, UNSW Medicine, University of New South Wales, Australia
2. Ministry of Health, Vietnam
3. School of Public Health and Community Medicine, UNSW Medicine, University of New South Wales, Australia

Corresponding author:

C Raina MacIntyre [rainam@protonmail.com](mailto:rainam@protonmail.com)

### Strengths and limitations of this study

- The use of cloth masks is widespread around the world during the COVID-19 pandemic, in healthcare and community settings due to shortages of medical masks.
- We previously published the only prospective randomised clinical trial (RCT) of cloth masks in 2015, which has been highly cited during the COVID-19 pandemic for the evidence it presents on poor performance and increased infection risk of cloth masks.
- This study provides analysis of unpublished data on washing of the cloth masks to examine whether the poor performance of cloth masks can be explained by washing practices.
- We show that self-washing of cloth masks are associated with double the risk of infection, and washing in the hospital laundry is protective. The design of the cloth mask, with 2 layers and cotton fabric, is also not ideal.
- Placing the burden of washing a cloth mask on health workers may result in forgetting to wash or inadequate washing. Hospitals should provide health workers with clean medical masks daily and not expect them to work in cloth masks or do their own washing.
- The data do not preclude better protection from a well designed cloth mask which is washed daily.

## Abstract

**Background:** In a previous randomised controlled trial in hospital health care workers (HCWs), cloth masks resulted in a higher risk of respiratory infections compared to medical masks. This was the only published RCT of cloth masks at the time of the COVID-19 pandemic.

**Objective:** to understand the association of washing to risk of respiratory infection from a two-layered cotton cloth mask in health care workers.

**Setting:** 14 secondary-level/tertiary-level hospitals in Hanoi, Vietnam.

**Participants:** A subgroup of 607 HCWs aged  $\geq 18$  years working full-time in selected high-risk wards, who used a two-layered cloth mask and were part of a randomised controlled clinical trial comparing medical masks and cloth masks.

**Intervention:** washing method for cloth masks (self-washing or hospital laundry). A sub-study of contamination of a sample of 15 cloth and medical masks was also conducted.

**Outcome measure:** infection rate over four weeks of follow up; and viral contamination of masks tested by multiplex PCR.

**Results:** Most (77%) HCW self-washed their masks. The risk of infection was more than double among HCW self-washing their masks compared to the hospital laundry (hazards ratio 2.04 (95% CI: 1.03-4.00);  $p=0.04$ ). Viral contamination with rhinovirus was identified on both used medical and cloth masks.

**Conclusions:** The poor performance of cloth masks may reflect inadequate self-washing, incorrect reporting of washing, as well as poor design with only two layers and lacking a water-resistant outer

1  
2 layer. The burden of washing a mask should not be placed on busy HCWs, and hospitals should  
3 provide clean masks daily. Until a better designed cloth mask can be proven to be as efficacious as a  
4 medical mask, these should not be used in healthcare. Daily washing of cloth masks in whatever  
5 setting they are used, including the community, is essential for safety.  
6  
7  
8  
9  
10  
11  
12  
13  
14  
15  
16  
17  
18  
19  
20  
21  
22  
23  
24  
25  
26  
27  
28  
29  
30  
31  
32  
33  
34  
35  
36  
37  
38  
39  
40  
41  
42  
43  
44  
45  
46  
47  
48  
49  
50  
51  
52  
53  
54  
55  
56  
57  
58  
59  
60

For peer review only

## Introduction

Global shortages of masks and respirators have resulted in agencies such as the US Centers for Disease Control (CDC) recommending cloth masks for health care workers (HCW) when disposable masks or respirators are not available.<sup>1</sup> We conducted the only randomised controlled clinical trial (RCT) of face masks available at the time of the COVID-19 pandemic, published in 2015.<sup>2</sup> This RCT showed that cloth masks resulted in a higher risk of infection than medical masks and also higher than the control arm. The rate of infection in the cloth mask arm was 1.67 times higher for laboratory confirmed viral illness and 13 times higher for clinical influenza-like illness.<sup>2</sup> In testing for water resistance, we also showed almost complete penetration of the cloth masks by sodium chloride droplets, more than double the penetration of medical masks. During the COVID-19 pandemic, where no medical grade mask was available, this RCT has raised concern about the safety of cloth masks as an alternative for HCWs.

In the RCT, over 90% of participants reported washing their masks daily.<sup>2</sup> On average, HCWs worked most days during the four-week trial period and reported washing their cloth masks on 92% of all days. They reported self-washing (80%), combined self-washing and hospital laundry (16%), and only hospital laundry (4%) as their method of washing.

We postulated that the poor performance of cloth masks may be due the design of the mask, which was a two-layered cotton mask manufactured in Vietnam, and possibly due to inadequate washing.<sup>2</sup> It was also possible that different distribution of cloth masks versus medical masks by ward type may have caused an apparently higher rate of infection in cloth mask users. Given the urgency around the safety of cloth masks and the controversy caused by the results of our RCT, we analysed unpublished data on cleaning of the cloth masks and ward allocation from the 2015 trial, as well as unpublished data from a sub-study on viral contamination of cloth and medical masks.

**Aims:** To determine the relationship of washing of masks to infection risk in cloth mask users. The secondary aim was to determine contamination with viral pathogens on the surface of cloth and medical masks.



**Methods:**

We selected all subjects who wore a cloth mask from the published RCT of cloth masks versus medical masks<sup>2</sup> (trial registration number in the Australian New Zealand Clinical Trials Registry was ACTRN12610000887077), which included subjects allocated to the cloth mask arm (n=569) as well as anyone in the control arm wearing only a cloth mask (38/458). This provided 607 subjects for further analysis of infection risk by washing and cleaning of cloth masks. The cloth mask used in the study was manufactured locally in Vietnam, and widely used in the secondary hospitals and also in tertiary hospitals (see Figure 1 below). The cloth mask studied was made of cotton and cotton blend fabric with 2 layers (inner and outer layer), without a filter layer, and with four strings in four corners of the mask as pictured in Figure 1. HCWs were provided five masks and asked to wash their mask daily and use a clean one each day. They were provided written instructions on washing the mask and self-reported the washing practices daily. They re-used the masks after self-washing or using the hospital laundry system for sterilization. The study was an epidemiologic analysis of unpublished data on contamination and washing of cloth masks, collected during the original RCT. We also looked at the distribution of HCW by ward type to see if there was any difference between the cloth and medical mask groups which could explain the higher rate of infection in the cloth mask group.

(Figure 1 here)

**Figure 1: Cloth mask used in the study**

The outcome of interest was infection, using a composite outcome variable measured in the study (clinical respiratory illness, influenza like illness and laboratory confirmation of one or multiple respiratory viruses).<sup>2</sup> In the study, 85% (58/68 positive RT-PCR tests) were for Rhinovirus.<sup>2</sup>

The data on the method of washing (self-washing or hospital laundry) as well as daily diary data on frequency of washing were analysed. Self-reported daily cleaning data from daily diary cards were analysed, as participants may have varied the cleaning frequency and type by day over the four-week follow up period. Person-days of mask washing were used as denominator data for analysis. Data on ward type (Intensive Care, Infectious Diseases, Paediatrics, Cancer and Haematology, Emergency and other) cleaning method and frequency of cleaning were analysed against infection risk

### Statistical analysis:

To determine the association, we adopted a survival analysis technique with time varying covariates. The data was arranged in “counting process format”<sup>3</sup>, where for each participant there were same number of records as the number of days of follow up. The outcome and study factor (mask cleaning) were assessed daily as binary variables. We generated Kaplan - Meier survival plots to compare the survival experience by mask cleaning practices and fitted the Cox proportional hazards model to estimate the hazards ratios. We also examined infection rate by type of ward using a Pearson’s chi-squared test.

**Sub-study of contamination of masks:** A total of 117 masks samples were collected – 102 from subjects with clinical respiratory illness in participating hospitals; and 15 from a sub-study as described below. All participants at this time also had a swab of their nose and throat collected for lab testing.

For the sub-study of mask contamination, 15 mask samples were collected from two purposively selected wards in Thanh Nhan General Hospital (a city hospital in Hanoi) between 28 March -8 April 2011. Intervention arms were cluster randomized by ward, so staff on each ward used the same type of mask. Nine participants were randomly selected from the cloth mask group (Intensive Care Unit), and six were randomly selected from medical masks group (Pediatric ward). In the cloth mask group, three participants were given five clean cloth mask per person, along with daily washing instructions, and masks were collected after one month. Three participants were requested to provide their cloth masks for testing after use. The remaining three participants were asked to provide their cloth masks which they used for previous four weeks.

In the medical mask group, three randomly selected participants were given one new medical mask per person in morning by the study team and the masks were collected the same day after one hour of use. The remaining three participants were given one new medical mask per person in morning and by the survey team and the masks were collected after four hours of use.

### Mask testing

1  
2 The mask testing method is shown in Figure 2. Mask samples were folded in double  
3 vertically. They were cut at the central part of the mask into 3 x 5 cm rectangles and  
4 separated into different layers - three layers for medical masks and two with cloth masks.  
5  
6 Masks were cut and placed in a tube (as described in figure 2) and sent to the lab for testing  
7 as described in the original study. <sup>2</sup> Each layer was put into different VTM tube and labelled,  
8 using a sterilized bamboo stick to push the layer deep into the media. Testing was  
9 performed using both normal and concentrated samples. A multiplex respiratory viral RT-  
10 PCR test was done for SVA/B, Influenza A/H3N2, A/H1N1) and B viruses, hMPV (reaction mix  
11 1); Parainfluenza viruses 1–4 (reaction mix 2); Rhinoviruses, Influenza C virus, SARS-CoV  
12 (reaction mix 3); Coronaviruses OC43, 229E, NL63 and HKU1 (reaction mix 4); and  
13 Adenoviruses and hBoV (reaction mix 5), as described in the original trial. <sup>2</sup>  
14  
15  
16  
17  
18  
19  
20  
21  
22  
23  
24  
25  
26  
27  
28  
29  
30  
31  
32  
33  
34  
35  
36  
37  
38  
39  
40  
41  
42  
43  
44  
45  
46  
47  
48  
49  
50  
51  
52  
53  
54  
55  
56  
57  
58  
59  
60

1  
2  
3  
4 **Figure 2: Mask testing**  
5

6 (Figure 2 here)  
7  
8  
9  
10  
11  
12  
13  
14  
15  
16  
17  
18  
19  
20  
21  
22  
23  
24  
25  
26  
27  
28  
29  
30  
31  
32  
33  
34  
35  
36  
37  
38  
39  
40  
41  
42  
43  
44  
45  
46  
47  
48  
49  
50  
51  
52  
53  
54  
55  
56  
57  
58  
59  
60

For peer review only

1  
2 Ethics approval for the study was granted by National Institute for Hygiene and Epidemiology (NIHE),  
3 Vietnam (approval number 05 IRB) and the Human Research Ethics Committee of the University of  
4 New South Wales (UNSW), Australia, (HREC approval number 10306).  
5  
6  
7  
8  
9

### 10 **Patient and Public Involvement**

11 There was no patient or public involvement.  
12  
13  
14  
15

### 16 **Results**

17  
18 There were 607 subjects with 9253 person-days of follow up who wore a cloth mask during the  
19 study. The highest rates of infection among cloth mask users was in the emergency (12%) and  
20 Intensive Care Units (10%). There was a similar distribution of participants between the ward types,  
21 in the medical mask and cloth mask arms with 138 medical mask users and 180 cloth mask users in  
22 ICU; and 163 medical mask users and 143 cloth mask users in the Emergency Department.  
23  
24  
25  
26

27 We also compared the infection rate of ICU and ED combined with other wards (paediatrics,  
28 infectious diseases, internal medicine, other). In the ICU and ED wards there were 36 (11.2%)  
29 infections among 323 cloth mask users and in all other wards there were 16 (5.6%) infections  
30 among 284 subjects. This difference was statistically significant ( $P=0.015$ ). There was no  
31 significant difference in infection rate between any ward types for medical masks, which was 5.33%  
32 overall (range 3.8-6.9%). In ICU, medical masks had 8/138 infections (5.8%) and in emergency 7/163  
33 (4.2%).  
34  
35  
36  
37  
38  
39

40 The most common method of cleaning was self-washing (77%,) followed by hospital laundry  
41 (13%). Over 90% (8396/9253 person-day observations) reported washing their mask daily.  
42 Only 15 subjects reported cleaning their mask <50% of the time over the four weeks of  
43 follow up. There were 7091/9253 person-days of self-washing reported, and 1177/9253  
44 person-days of hospital laundry washing. Figure 3 shows that hospital laundry was superior  
45 to self-washing in the survival analysis.  
46  
47  
48  
49  
50  
51  
52  
53  
54  
55  
56  
57  
58  
59  
60

1  
2  
3  
4  
5  
6  
7  
8  
9  
10  
11  
12  
13  
14  
15  
16  
17  
18  
19  
20  
21  
22  
23  
24  
25  
26  
27  
28  
29  
30  
31  
32  
33  
34  
35  
36  
37  
38  
39  
40  
41  
42  
43  
44  
45  
46  
47  
48  
49  
50  
51  
52  
53  
54  
55  
56  
57  
58  
59  
60

### Figure 3. Survival analysis of infection by mask washing location (hospital laundry vs self-washing)

(Figure 3 here)

The risk of infection just over double for HCW who self-washing their cloth masks compared to using the hospital laundry. The hazards ratio of infection for self-washing was 2.04 (95% CI: 1.03-4.00); p=0.04.

#### Mask testing results:

In standard testing, 2% (2/117) of masks samples were positive for virus. Rhinoviruses were isolated from the internal layer and external layers respectively of one medical mask sample each.

In concentrated testing, around 4% (4/117 mask samples were positive, two medical masks and two cloth masks. Rhinoviruses were isolated from internal and external layers of two medical masks and only the internal layer of two cloth mask samples. Paired nose and throat swabs of these same subjects were also positive for Rhinoviruses.

## Discussion

While the majority of participants reported washing their mask daily, self-washing more than doubled the risk of infection. We do not have data on the quality of self-washing, but it is possible that those who reported self-washing either did not actually wash the masks daily (but reported that they did) or washed them insufficiently. Participants who were busy and did not have time for washing may have felt uncomfortable reporting that they failed to wash the masks. Given self-washing was by far the commonest methods reported (77%), if a proportion who reported daily washing did not actually do so, this could explain the poor performance of cloth masks in the original RCT, and reiterates the importance of daily washing of these products.<sup>2</sup> Unlike medical masks, which are regulated on water resistance, cotton masks are not water resistant, and will become damp more readily than medical masks. Given the outer layer of the cloth mask was absorbent cotton rather than water-resistant, this could pose a risk of contamination if masks are not washed daily.

The difference in clinical outcomes in the trial may be explained by the fact the medical mask users received a new mask daily, whereas cloth mask users received 5 masks to wash and reuse. The principle of a re-usable cloth mask is that a user has at least two masks so they can be washed daily to ensure a clean mask each day. However, for medical mask users the simple fact of being provided a clean mask daily may be a key factor in reducing risk of infection, whereas busy health workers may forget to wash a cloth mask daily, as it is an added burden on their workload. We do not recommend cloth masks for health workers, but if used, health facilities should provide clean masks daily to health workers, and also launder them in the hospital laundry. Placing the burden of cleaning on a HCW may increase the risk of unsafe use and infection.

The majority of participants in the trial who had a confirmed viral infection had rhinovirus, and this was the only virus identified on mask samples, on both the inner and outer layers in medical masks and on the inner layer of cloth masks. Whilst both mask types can become contaminated, there was no difference in contamination between medical and cloth masks - however, the sample size was very small. More research is needed to quantify longitudinal contamination of unwashed cloth masks over time and by usage frequency.

A meta-analysis of mask use for SARS, SARS-CoV-2 and MERS CoV showed that masks were 85% protective, and that a 12-layered cloth mask is as protective as a medical mask.<sup>4</sup> There are no data on other combinations of layers, except that single layered masks are not protective.<sup>4</sup> Our original

1  
2 RCT suggests that even a two-layered cotton and cotton blend mask is not protective. <sup>5</sup> However, this  
3 does not preclude more protective cloth mask designs for community use.  
4  
5

6  
7  
8 The principles of a safer cloth mask would include at least three layers, water-resistant fabric for the  
9 outer layer, fine weave, high thread count, fit around the face and ties instead of ear loops, the latter  
10 which have been reported to reduce fit. They should also be washed daily in soap and water, and the  
11 design should allow frequent washing without compromising the design features. The WHO changed  
12 it's recommendation on community mask use in June 2020 and provided guidance on optimal design  
13 of a cloth mask. <sup>6</sup>  
14  
15  
16  
17  
18  
19

20 The distribution of trial participants between ward types was similar, so this did not explain the poor  
21 performance of cloth masks. Further, infection rates were not significantly different by ward type for  
22 medical masks – only for cloth masks, which had a significantly higher infection risk for ICU and  
23 emergency wards. ICU and Emergency wards are recognised as high-risk, high transmission settings,  
24 with documented aerosolised viruses such as influenza and COVID-19,<sup>7,8,9</sup> so a cloth mask may not be  
25 adequate in these wards. Health workers in ICU or emergency should not be asked to wear a cloth  
26 mask.  
27  
28  
29  
30  
31  
32  
33

34 We conclude that two-layered cotton masks as used in the original RCT are not a safe option for  
35 health workers, especially in ICU or Emergency wards. A respirator provides 96% protection for  
36 health workers, compared to 67% with a medical mask, <sup>4</sup> and should be the standard for health  
37 workers treating COVID-19 patients. <sup>10</sup> Countries should take responsibility for scaling up  
38 manufacturing of medical masks and respirators for health workers, instead of forcing them to work  
39 in sub-optimal personal protective equipment.<sup>11</sup>  
40  
41  
42  
43  
44

45 In summary, the poor performance of cloth masks in our RCT may reflect inadequate washing as well  
46 as poor design with only two layers and lacking a water-resistant outer layer. Daily washing of cloth  
47 masks in whatever setting they are used, including the community, is essential for safety. Reports of  
48 self-washing may have over-estimated frequency of washing and there may have been variability in  
49 the quality of washing. The additional burden of being responsible for cleaning of a mask for busy  
50 HCWs in the midst of a pandemic may compromise safety, if workers forget to wash the mask.  
51  
52 Removing this responsibility from HCWs and minimising the burden on them for their own  
53 protection, by providing daily clean masks is recommended in hospitals. If cloth masks are used,  
54 cleaning in the hospital laundry and daily provision of clean masks is safer than self-washing. The  
55 data from our RCT are specific to a two-layered cotton mask and cannot be generalised to all cloth  
56  
57  
58  
59  
60



1  
2 masks. More research is needed on optimal design of cloth masks to improve protection, and until  
3 such a design can be proven to be as effective as medical masks, they should not be used for HCWs.  
4  
5  
6  
7  
8  
9

10 **Author contributions:** CR MacIntyre conceived, designed study, developed data analysis plan, wrote  
11 the manuscript. B Rahman and AA Chughtai analysed the data and wrote and reviewed the  
12 manuscript. TC Dung reviewed original data and reviewed and wrote the manuscript. H Seale  
13 reviewed the analysis and wrote the manuscript.  
14  
15  
16

17 **Competing interests:** TC Dung works for the Vietnam Ministry of Health. There are no other  
18 competing interests.  
19  
20

21 **Data sharing:** The data are not available for sharing under the conditions of ethics approval from  
22 Vietnam.  
23  
24

25 **Funding:** C. Raina MacIntyre is supported by a NHMRC Principal Research Fellowship, grant number  
26 1137582. The original RCT was funded by the Australian Research Council.  
27  
28

29 **Acknowledgments:** We would like to acknowledge the participating hospitals and staff in Hanoi,  
30 Vietnam.  
31  
32  
33  
34

### 35 **References**

- 36  
37 1. Centers for Disease Control and Prevention. Strategies for Optimizing the Supply of Facemasks.  
38 USA: CDC, 2020. [https://www.cdc.gov/coronavirus/2019-ncov/hcp/ppe-strategy/face-](https://www.cdc.gov/coronavirus/2019-ncov/hcp/ppe-strategy/face-masks.html)  
39 [masks.html](https://www.cdc.gov/coronavirus/2019-ncov/hcp/ppe-strategy/face-masks.html)  
40  
41
- 42 2. MacIntyre CR, Seale H, Dung TC, et al. A cluster randomised trial of cloth masks compared with  
43 medical masks in healthcare workers. *BMJ open* 2015;5(4):e006577-e77. doi:  
44 10.1136/bmjopen-2014-006577  
45  
46
- 47 3. Kleinbaum DGK, M. Survival Analysis. In: Mitchell GS, J.M., ed. Statistics for Biology and Health.  
48 Switzerland: Springer 2012: E book. ISSN: 1431-8776  
49 <https://www.springer.com/gp/book/9781441966452>  
50  
51
- 52 4. Chu DK, Akl EA, Duda S, et al. Physical distancing, face masks, and eye protection to prevent  
53 person-to-person transmission of SARS-CoV-2 and COVID-19: a systematic review and meta-  
54 analysis. *The Lancet*. 2020 doi: 10.1016/S0140-6736(20)31142-9  
55  
56
- 57 5. MacIntyre CRC, A.A.; Dung, C.T; Seale, H.S. Covid-19: Should cloth masks be used by healthcare  
58 workers as a last resort? *BMJ* 2020 [published Online First: April 9 2020]  
59  
60

- 1  
2 [https://blogs.bmj.com/bmj/2020/04/09/covid-19-should-cloth-masks-be-used-by-](https://blogs.bmj.com/bmj/2020/04/09/covid-19-should-cloth-masks-be-used-by-healthcare-workers-as-a-last-resort/)  
3 [healthcare-workers-as-a-last-resort/](https://blogs.bmj.com/bmj/2020/04/09/covid-19-should-cloth-masks-be-used-by-healthcare-workers-as-a-last-resort/)  
4
- 5 6. (WHO). WHO. Coronavirus disease (COVID-19) advice for the public: When and how to use masks.  
6 Geneva, 2020: [https://www.who.int/emergencies/diseases/novel-coronavirus-2019/advice-](https://www.who.int/emergencies/diseases/novel-coronavirus-2019/advice-for-public/when-and-how-to-use-masks)  
7 [for-public/when-and-how-to-use-masks](https://www.who.int/emergencies/diseases/novel-coronavirus-2019/advice-for-public/when-and-how-to-use-masks).  
8  
9
- 10 7. Blachere, F. M., W. G. Lindsley, T. A. Pearce, S. E. Anderson, M. Fisher, R. Khakoo, B. J. Meade, O.  
11 Lander, S. Davis, R. E. Thewlis, I. Celik, B. T. Chen and D. H. Beezhold (2009). "Measurement  
12 of Airborne Influenza Virus in a Hospital Emergency Department." *Clinical Infectious Diseases*  
13 **48**(4): 438-440.  
14  
15
- 16 8. Santarpia, J. L., D. N. Rivera, V. Herrera, M. J. Morwitzer, H. Creager, G. W. Santarpia, K. K. Crown,  
17 D. Brett-Major, E. Schnaubelt, M. J. Broadhurst, J. V. Lawler, S. P. Reid and J. J. Lowe (2020).  
18 "Transmission Potential of SARS-CoV-2 in Viral Shedding Observed at the University of  
19 Nebraska Medical Center." medRxiv: 2020. DOI: 10.1101/2020.03.23.200394467.  
20  
21
- 22 9. Guo, Z. D. W., Z.Y; Zhang, S.F; L; et al (2020). "Aerosol and surface distribution of severe acute  
23 respiratory syndrome coronavirus 2 in hospital wards, Wuhan, China, 2020. *Emerg Infect Dis*.  
24 2020. DOI: <https://doi.org/10.3201/eid2607.200885>.  
25  
26
- 27 10. MacIntyre CR, Wang Q. Physical distancing, face masks, and eye protection for prevention of  
28 COVID-19. *The Lancet* 2020; Online first doi: 10.1016/S0140-6736(20)31183-1  
29  
30
- 31 11. Greenhalgh T, Schmid MB, Czypionka T, et al. - Face masks for the public during the covid-19  
32 crisis. – *BMJ*. 2020 Apr 09; 369:- m1435. doi: <https://doi.org/10.1136/bmj.m1435>  
33  
34  
35  
36  
37  
38  
39  
40  
41  
42  
43  
44  
45  
46  
47  
48  
49  
50  
51  
52  
53  
54  
55  
56  
57  
58  
59  
60

1  
2  
3  
4  
5  
6  
7  
8  
9  
10  
11  
12  
13  
14  
15  
16  
17  
18  
19  
20  
21  
22  
23  
24  
25  
26  
27  
28  
29  
30  
31  
32  
33  
34  
35  
36  
37  
38  
39  
40  
41  
42  
43  
44  
45  
46  
47  
48  
49  
50  
51  
52  
53  
54  
55  
56  
57  
58  
59  
60

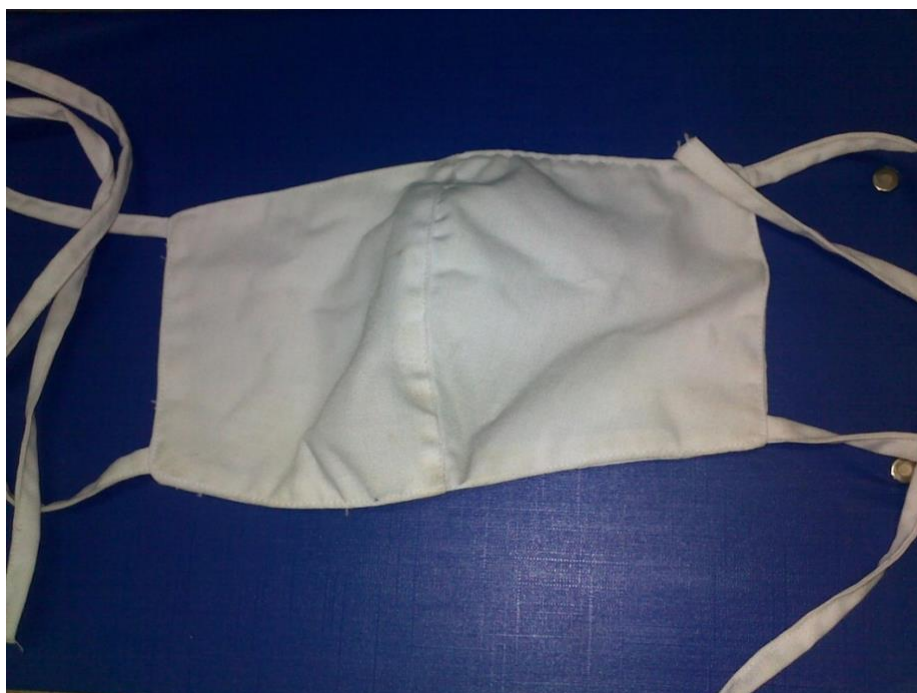

**Figure 1: Cloth mask used in the study**

er review only

Figure 2: Mask testing

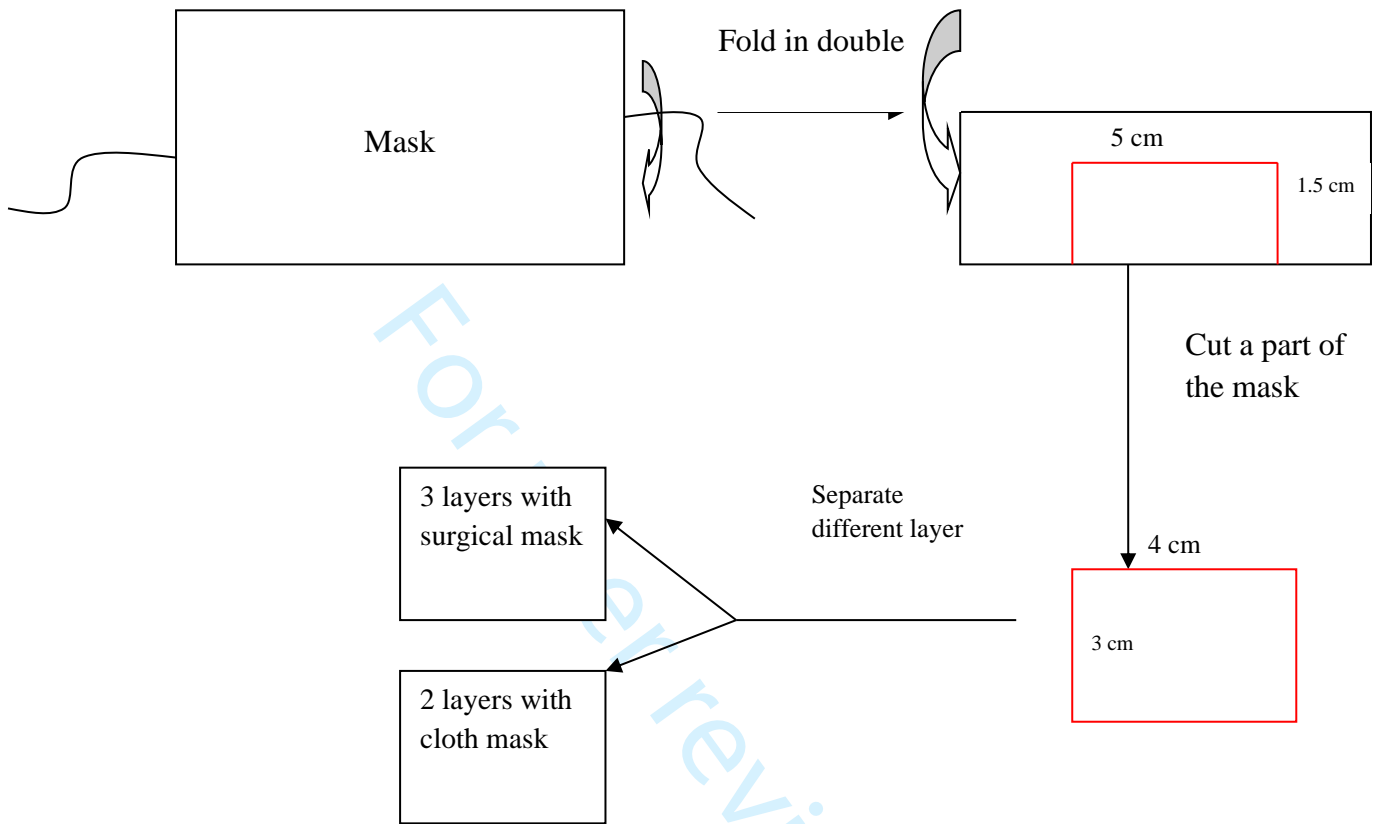

1  
2  
3  
4  
5  
6  
7  
8  
9  
10  
11  
12  
13  
14  
15  
16  
17  
18  
19  
20  
21  
22  
23  
24  
25  
26  
27  
28  
29  
30  
31  
32  
33  
34  
35  
36  
37  
38  
39  
40  
41  
42  
43  
44  
45  
46  
47  
48  
49  
50  
51  
52  
53  
54  
55  
56  
57  
58  
59  
60

For peer review only

Figure 3. Survival analysis of infection by mask washing location (hospital laundry vs self-washing)

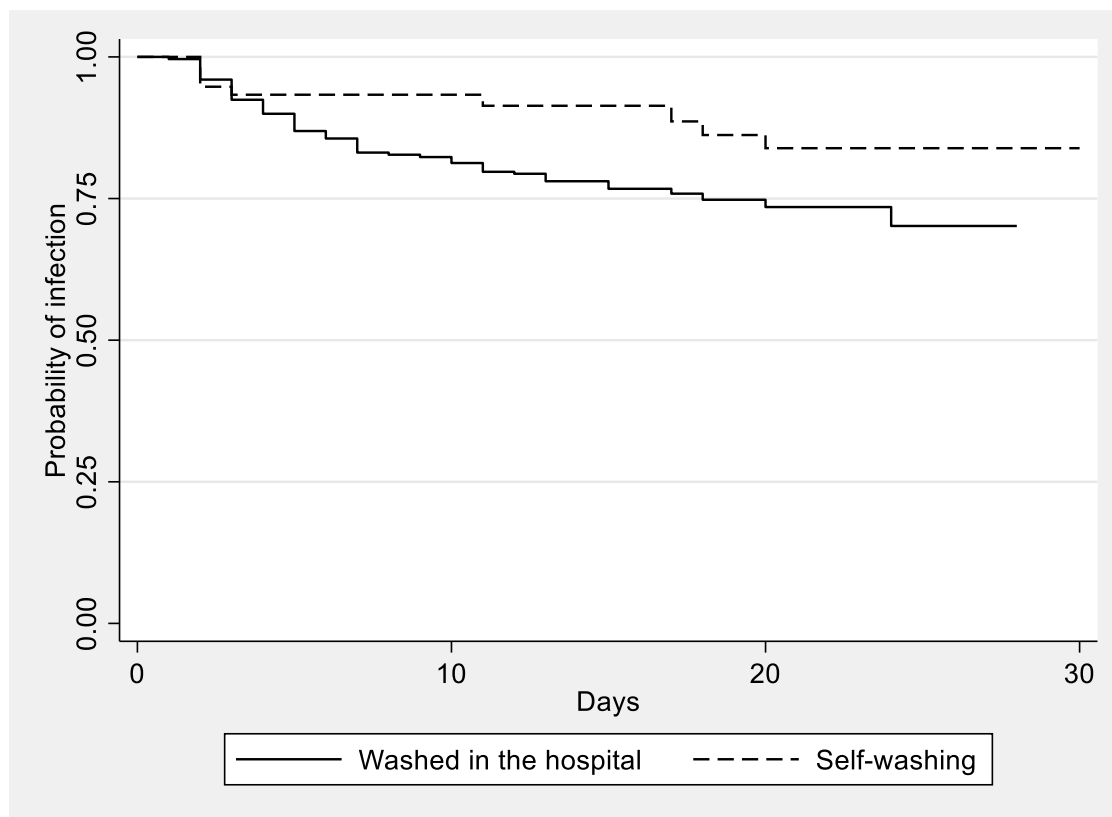

view only

## Research checklist

1. **Author information:** Yes
2. **Manuscript length and formatting:** Yes
3. **Tables:** No tables
4. **Figures:** Yes
5. **References:** Yes
6. **Supplementary files:** Yes
7. **Statements:** Have you included the necessary statements relating to [author contributorship](#), [competing interests and funding](#), [data sharing](#), [patient consent](#) and [ethical approval](#)? Yes
8. **Acknowledgements:** Have you acknowledged all contributors who do not meet the criteria for authorship? Have you acknowledged if your work has been previously presented at a conference/published as a conference abstract? Yes
9. **Suggested reviewers:** Have you [suggested reviewers](#) for your paper (if required by the journal)? Yes
10. **Research reporting checklists:** Have you either provided the [appropriate reporting guideline](#) for your study type, or explained why a checklist isn't required? Provided
11. **Reproducing figures:** Have you [obtained permission from the copyright holder](#) to re-use any previously published material? Has the source been acknowledged? N/A

# BMJ Open

## Relationship of cloth mask washing and respiratory infection risk in health workers

|                                 |                                                                                                                                                                                                                                                                                                                                                                                                                                                                                                                   |
|---------------------------------|-------------------------------------------------------------------------------------------------------------------------------------------------------------------------------------------------------------------------------------------------------------------------------------------------------------------------------------------------------------------------------------------------------------------------------------------------------------------------------------------------------------------|
| Journal:                        | <i>BMJ Open</i>                                                                                                                                                                                                                                                                                                                                                                                                                                                                                                   |
| Manuscript ID                   | bmjopen-2020-042045.R1                                                                                                                                                                                                                                                                                                                                                                                                                                                                                            |
| Article Type:                   | Original research                                                                                                                                                                                                                                                                                                                                                                                                                                                                                                 |
| Date Submitted by the Author:   | 19-Jul-2020                                                                                                                                                                                                                                                                                                                                                                                                                                                                                                       |
| Complete List of Authors:       | MacIntyre, C Raina; University of New South Wales, The Kirby Institute; Arizona State University, College of Public Affairs and Community Solutions<br>Dung, Tham; Ministry of Health, Vietnam<br>Chughtai, Abrar; University of New South Wales, School of Public Health and Community Medicine<br>Seale, Holly; University of New South Wales, School of Public Health and Community Medicine<br>Rahman, Bayzidur; School of Public Health and Community Medicine, UNSW Medicine, University of New South Wales |
| <b>Primary Subject Heading</b>: | Infectious diseases                                                                                                                                                                                                                                                                                                                                                                                                                                                                                               |
| Secondary Subject Heading:      | Public health, Infectious diseases                                                                                                                                                                                                                                                                                                                                                                                                                                                                                |
| Keywords:                       | INFECTIOUS DISEASES, Infection control < INFECTIOUS DISEASES, Respiratory infections < THORACIC MEDICINE                                                                                                                                                                                                                                                                                                                                                                                                          |
|                                 |                                                                                                                                                                                                                                                                                                                                                                                                                                                                                                                   |

SCHOLARONE™  
Manuscripts





I, the Submitting Author has the right to grant and does grant on behalf of all authors of the Work (as defined in the below author licence), an exclusive licence and/or a non-exclusive licence for contributions from authors who are: i) UK Crown employees; ii) where BMJ has agreed a CC-BY licence shall apply, and/or iii) in accordance with the terms applicable for US Federal Government officers or employees acting as part of their official duties; on a worldwide, perpetual, irrevocable, royalty-free basis to BMJ Publishing Group Ltd ("BMJ") its licensees and where the relevant Journal is co-owned by BMJ to the co-owners of the Journal, to publish the Work in this journal and any other BMJ products and to exploit all rights, as set out in our [licence](#).

The Submitting Author accepts and understands that any supply made under these terms is made by BMJ to the Submitting Author unless you are acting as an employee on behalf of your employer or a postgraduate student of an affiliated institution which is paying any applicable article publishing charge ("APC") for Open Access articles. Where the Submitting Author wishes to make the Work available on an Open Access basis (and intends to pay the relevant APC), the terms of reuse of such Open Access shall be governed by a Creative Commons licence – details of these licences and which [Creative Commons](#) licence will apply to this Work are set out in our licence referred to above.

Other than as permitted in any relevant BMJ Author's Self Archiving Policies, I confirm this Work has not been accepted for publication elsewhere, is not being considered for publication elsewhere and does not duplicate material already published. I confirm all authors consent to publication of this Work and authorise the granting of this licence.

## Relationship of cloth mask washing and respiratory infection risk in health workers

### Authors

Chandini Raina MacIntyre(1)

Tham Chi Dung (2)

Abrar Ahmad Chughtai(3)

Holly Seale(3)

Md Bayzidur Rahman(3)

1. Biosecurity Program, The Kirby Institute, UNSW Medicine, University of New South Wales, Australia
2. Ministry of Health, Vietnam
3. School of Public Health and Community Medicine, UNSW Medicine, University of New South Wales, Australia

Corresponding author:

C Raina MacIntyre [rainam@protonmail.com](mailto:rainam@protonmail.com)

## Abstract

**Background:** In a previous randomised controlled trial in hospital health care workers (HCWs), cloth masks resulted in a higher risk of respiratory infections compared to medical masks. This was the only published RCT of cloth masks at the time of the COVID-19 pandemic.

**Objective:** to do a post-hoc analysis of unpublished data on mask washing and mask contamination from the original RCT to further understand poor performance of the two-layered cotton cloth mask used by health care workers in that RCT.

**Setting:** 14 secondary-level/tertiary-level hospitals in Hanoi, Vietnam.

**Participants:** A subgroup of 607 HCWs aged  $\geq 18$  years working full-time in selected high-risk wards, who used a two-layered cloth mask and were part of a randomised controlled clinical trial comparing medical masks and cloth masks.

**Intervention:** washing method for cloth masks (self-washing or hospital laundry). A sub-study of contamination of a sample of 15 cloth and medical masks was also conducted.

**Outcome measure:** infection rate over four weeks of follow up; and viral contamination of masks tested by multiplex PCR.

**Results:** Viral contamination with rhinovirus was identified on both used medical and cloth masks. Most HCW (77%) self-washed their masks by hand. The risk of infection was more than double among HCW self-washing their masks compared to the hospital laundry (hazards ratio 2.04 (95% CI: 1.03-4.00);  $p=0.04$ ). There was no significant difference in infection

1  
2 between HCW who wore cloth masks washed in the hospital laundry compared to medical  
3  
4 masks.  
5

6 **Conclusions:** Using self-reported method of washing, we showed double the risk of infection risk if  
7  
8 masks were self-washed by hand by HCW. The majority of HCWs in the study reported hand-washing  
9  
10 their mask themselves. This could explain the poor performance of two layered cloth masks, if the  
11  
12 self-washing was inadequate or not done as frequently as reported. Both cloth and medical masks  
13  
14 were contaminated, but only cloth masks were re-used in the study, reiterating the importance of  
15  
16 daily washing of re-usable cloth masks using proper method.  
17

18  
19 Trial registration number in the Australian New Zealand Clinical Trials Registry was  
20  
21 ACTRN12610000887077  
22  
23  
24  
25

#### 26 **Strengths and limitations of this study**

- 27 • Unpublished data on washing and contamination of the cloth masks was available for post-  
28  
29 hoc analysis of an original published RCT, which allowed further understand of reasons for  
30  
31 the poor performance of cloth masks in the RCT.
- 32 • The method and frequency of washing of cloth masks was self-reported by health workers,  
33  
34 which could be subject to recall bias or misreporting.
- 35 • The contamination study showed contamination of both medical and cloth masks but had a  
36  
37 small sample.
- 38 • The data are specific for the 2-layered cloth mask used in the study and do not preclude  
39  
40 better protection from a well-designed cloth mask which is washed daily.  
41  
42  
43  
44  
45  
46  
47  
48  
49  
50  
51  
52  
53  
54  
55  
56  
57  
58  
59  
60

## Introduction

Global shortages of masks and respirators have resulted in agencies such as the US Centers for Disease Control (CDC) recommending cloth masks for health care workers (HCW) when disposable masks or respirators are not available.<sup>1</sup> We conducted the only randomised controlled clinical trial (RCT) of face masks available at the time of the COVID-19 pandemic, published in 2015.<sup>2</sup> This RCT showed that cloth masks resulted in a higher risk of infection than medical masks and also higher than the control arm. The rate of infection in the cloth mask arm was 1.67 times higher for laboratory confirmed viral illness and 13 times higher for clinical influenza-like illness.<sup>2</sup> In testing for water resistance, we also showed almost complete penetration of the cloth masks by sodium chloride droplets, more than double the penetration of medical masks. During the COVID-19 pandemic, where no medical grade mask was available, this RCT has raised concern about the safety of cloth masks as an alternative for HCWs.

In the RCT, over 90% of participants reported washing their masks daily.<sup>2</sup> On average, HCWs worked most days during the four-week trial period and reported washing their cloth masks on 92% of all days. They reported self-washing (80%), combined self-washing and hospital laundry (16%), and only hospital laundry (4%) as their method of washing.

We postulated that the poor performance of cloth masks may be due the design of the mask, which was a two-layered cotton mask manufactured in Vietnam, and possibly due to inadequate washing.<sup>2</sup> It was also possible that different distribution of cloth masks versus medical masks by ward type may have caused an apparently higher rate of infection in cloth mask users. Given the urgency around the safety of cloth masks and the controversy caused by the results of our RCT, we analysed unpublished data on cleaning of the cloth masks and ward allocation from the 2015 trial, as well as unpublished data from a sub-study on viral contamination of cloth and medical masks.

**Aims:** To determine the relationship of washing of masks to infection risk in cloth mask users. The secondary aim was to determine contamination with viral pathogens on the surface of cloth and medical masks.

## Methods:

We selected all subjects who wore a cloth mask from the published RCT of cloth masks versus medical masks<sup>2</sup> (trial registration number in the Australian New Zealand Clinical Trials Registry was ACTRN12610000887077), which included subjects allocated to the cloth mask arm (n=569) as well as anyone in the control arm wearing only a cloth mask (38/458). This provided 607 subjects for further analysis of infection risk by washing and cleaning of cloth masks. The cloth mask used in the study was manufactured locally in Vietnam, and widely used in the secondary hospitals and also in tertiary hospitals (see Figure 1 below). The cloth mask studied was made of cotton and cotton blend fabric with 2 layers (inner and outer layer), without a filter layer, and with four strings in four corners of the mask as pictured in Figure 1. HCWs were provided five masks and asked to wash their mask daily and use a clean one each day. They could hand-wash the masks themselves in the hospital with soap and tap water and hang them out to dry in a space provided for HCW (Figure 1), or they could get the masks laundered in the hospital laundry in an automatic washing machine with detergent and hot water, if available in their hospital. They were provided written instructions on washing the mask themselves and self-reported their washing practices daily. They re-used the masks after self-washing or using the hospital laundry system. The study was an epidemiologic analysis of unpublished data on contamination and washing of cloth masks, collected during the original RCT. We also looked at the distribution of HCW by ward type to see if there was any difference between the cloth and medical mask groups which could explain the higher rate of infection in the cloth mask group.

(Figure 1 here)

### Figure 1: Cloth mask used in the study

The outcome of interest was infection, using a composite outcome variable measured in the study (clinical respiratory illness, influenza like illness and laboratory confirmation of one or multiple respiratory viruses).<sup>2</sup> In the study, 85% (58/68 positive RT-PCR tests) were for Rhinovirus.<sup>2</sup>

The data on the method of washing (self-washing or hospital laundry) as well as daily diary data on frequency of washing were analysed. Self-reported daily cleaning data from daily diary cards were analysed, as participants may have varied the cleaning frequency and type by day over the four-week follow up period. Person-days of mask washing were used as

denominator data for analysis. Follow up data were censored when infection occurred. We compared cloth masks which were self-washed by hand, with cloth masks that were washed in the hospital laundry and medical masks. Data on ward type (Intensive Care, Infectious Diseases, Paediatrics, Cancer and Haematology, Emergency and other) cleaning method and frequency of cleaning were analysed against infection risk

### Statistical analysis:

To determine the association, we adopted a survival analysis technique with time varying covariates. The data was arranged in “counting process format”<sup>3</sup>, where for each participant there were same number of records as the number of days of follow up. The outcome and study factor (mask cleaning) were assessed daily as binary variables. We generated Kaplan - Meier survival plots to compare the survival experience by mask cleaning practices and fitted the Cox proportional hazards model to estimate the hazards ratios. We also examined infection rate by type of ward using a Pearson’s chi-squared test.

**Sub-study of contamination of masks:** A total of 117 masks samples were collected – 102 from subjects with clinical respiratory illness in participating hospitals; and 15 from a sub-study as described below. All participants at this time also had a swab of their nose and throat collected for lab testing.

For the sub-study of mask contamination, 15 mask samples were collected from two purposively selected wards in Thanh Nhan General Hospital (a city hospital in Hanoi) between 28 March -8 April 2011. Intervention arms were cluster randomized by ward, so staff on each ward used the same type of mask. Nine participants were randomly selected from the cloth mask group (Intensive Care Unit), and six were randomly selected from medical masks group (Pediatric ward). In the cloth mask group, three participants were given five clean cloth mask per person, along with daily washing instructions, and masks were collected after one month. Three participants were requested to provide their cloth masks for testing after use. The remaining three participants were asked to provide their cloth masks which they used for previous four weeks.

In the medical mask group, three randomly selected participants were given one new medical mask per person in morning by the study team and the masks were collected the

1  
2 same day after one hour of use. The remaining three participants were given one new  
3  
4 medical mask per person in morning and by the survey team and the masks were collected  
5  
6 after four hours of use.  
7  
8  
9

### 10 **Mask testing**

11  
12 The mask testing method is shown in Figure 2. Mask samples were collected after use by  
13  
14 HCWs. They were folded in double vertically. They were cut at the central part of the mask  
15  
16 into 3 x 5 cm rectangles and separated into different layers - three layers for medical masks  
17  
18 and two with cloth masks. Masks were cut and placed in a tube (as described in figure 2) and  
19  
20 sent to the lab for testing as described in the original study. <sup>2</sup> Each layer was put into  
21  
22 different VTM tube and labelled, using a sterilized bamboo stick to push the layer deep into  
23  
24 the media. Testing was performed using both normal and concentrated samples. A multiplex  
25  
26 respiratory viral RT-PCR test was done for SVA/B, Influenza A/H3N2, A/H1N1) and B viruses,  
27  
28 hMPV (reaction mix 1); Parainfluenza viruses 1–4 (reaction mix 2); Rhinoviruses, Influenza C  
29  
30 virus, SARS-CoV (reaction mix 3); Coronaviruses OC43, 229E, NL63 and HKU1 (reaction mix  
31  
32 4); and Adenoviruses and hBoV (reaction mix 5), as described in the original trial. <sup>2</sup>  
33  
34  
35  
36  
37  
38  
39  
40  
41  
42  
43  
44  
45  
46  
47  
48  
49  
50  
51  
52  
53  
54  
55  
56  
57  
58  
59  
60



1  
2  
3  
4  
5  
6  
7  
8  
9  
10  
11  
12  
13  
14  
15  
16  
17  
18  
19  
20  
21  
22  
23  
24  
25  
26  
27  
28  
29  
30  
31  
32  
33  
34  
35  
36  
37  
38  
39  
40  
41  
42  
43  
44  
45  
46  
47  
48  
49  
50  
51  
52  
53  
54  
55  
56  
57  
58  
59  
60

**Figure 2: Mask testing**

(Figure 2 here)

For peer review only

1  
2 Ethics approval for the study was granted by National Institute for Hygiene and Epidemiology (NIHE),  
3 Vietnam (approval number 05 IRB) and the Human Research Ethics Committee of the University of  
4 New South Wales (UNSW), Australia, (HREC approval number 10306).  
5  
6  
7  
8  
9

### 10 **Patient and Public Involvement**

11 There was no patient or public involvement.  
12  
13  
14  
15

### 16 **Results**

17  
18 There were 607 subjects with 9253 person-days of follow up who wore a cloth mask during the  
19 study. The highest rates of infection among cloth mask users was in the emergency (12%) and  
20 Intensive Care Units (10%). There was a similar distribution of participants between the ward types,  
21 in the medical mask and cloth mask arms with 138 medical mask users and 180 cloth mask users in  
22 ICU; and 163 medical mask users and 143 cloth mask users in the Emergency Department.  
23  
24  
25  
26

27 We also compared the infection rate of ICU and ED combined with other wards (paediatrics,  
28 infectious diseases, internal medicine, other). In the ICU and ED wards there were 36 (11.2%)  
29 infections among 323 cloth mask users and in all other wards there were 16 (5.6%) infections  
30 among 284 subjects. This difference was statistically significant ( $P=0.015$ ). There was no  
31 significant difference in infection rate between any ward types for medical masks, which was 5.33%  
32 overall (range 3.8-6.9%). In ICU, medical masks had 8/138 infections (5.8%) and in emergency 7/163  
33 (4.2%).  
34  
35  
36  
37  
38  
39

40 The most common method of cleaning was self-washing by hand (77%,) followed by hospital  
41 laundry (13%). Some HCW used both methods at different times. Over 90% (8396/9253  
42 person-day observations) reported washing their mask daily. Only 15 subjects reported  
43 cleaning their mask <50% of the time over the four weeks of follow up. There were  
44 7091/9253 person-days of self-washing reported, and 1177/9253 person-days of hospital  
45 laundry washing. Rates of infection among HCW who self-washed their cloth masks by hand  
46 and who used the hospital laundry were 2/100 person days (110/5417 person days) and 0.85  
47 per 100 person days (9/1052 person days) respectively. The rate of infection among HCW  
48 who wore a medical mask was 0.85 per 100 person days (139/16,284 person days). The risk  
49 of infection just over double for HCW who self-washed their cloth masks by hand compared to using  
50 the hospital laundry. The hazards ratio of infection for self-washing was 2.04 (95% CI: 1.03-4.00);  
51  
52  
53  
54  
55  
56  
57  
58  
59  
60  $p=0.04$ .

1  
2 There was no significant difference in infection rate between cloth masks washed in the  
3 hospital laundry and medical masks ( $p=0.5$ ). Figure 3 shows that hospital laundry was  
4 superior to self-washing in the survival analysis.  
5  
6  
7  
8  
9  
10  
11  
12  
13  
14  
15  
16  
17  
18  
19  
20  
21  
22  
23  
24  
25  
26  
27  
28  
29  
30  
31  
32  
33  
34  
35  
36  
37  
38  
39  
40  
41  
42  
43  
44  
45  
46  
47  
48  
49  
50  
51  
52  
53  
54  
55  
56  
57  
58  
59  
60

For peer review only

1  
2 **Figure 3. Survival analysis of infection by mask washing location (hospital laundry vs self-**  
3 **washing)**  
4

5  
6 (Figure 3 here)  
7  
8  
9

10 **Mask testing results:**  
11

12 In standard testing, 2% (2/117) of masks samples were positive for virus. Rhinoviruses were isolated  
13 from the internal layer and external layers respectively of one medical mask sample each.  
14

15  
16 In concentrated testing, around 4% (4/117 mask samples were positive, two medical masks and two  
17 cloth masks. Rhinoviruses were isolated from internal and external layers of two medical masks and  
18 only the internal layer of two cloth mask samples. Paired nose and throat swabs of these same  
19 subjects were also positive for Rhinoviruses.  
20  
21  
22  
23  
24  
25  
26  
27  
28  
29  
30  
31  
32  
33  
34  
35  
36  
37  
38  
39  
40  
41  
42  
43  
44  
45  
46  
47  
48  
49  
50  
51  
52  
53  
54  
55  
56  
57  
58  
59  
60

## Discussion

HCW who self-washed their masks in the hospital by hand had double the risk of infection than those who used the hospital laundry. Self-washing was by far the commonest method of washing (77% of cloth mask users), which could explain the poor performance of cloth masks in the intention to treat analysis in the original RCT, and reiterates the importance of daily washing of these products.<sup>2</sup> HCW whose cloth masks were laundered in the hospital laundry were protected at the same level as those who wore disposable medical masks.

While the majority of participants reported washing their mask daily, it appears that the hand washing was not adequate or that a proportion who reported daily washing did not actually do so every day. Hand washing in the hospital is usually done in the available wash basins, some of which do not have hot water, which may reduce the effectiveness of washing. The WHO recommends machine washing with warm water at 60–90°C and laundry detergent.<sup>4</sup>

We showed that both cloth and medical mask can become contaminated. There was no difference in contamination between medical and cloth masks - however, the sample size was very small. The majority of participants in the trial who had a confirmed viral infection had rhinovirus, and this was the only virus identified on mask samples, on both the inner and outer layers in medical masks and on the inner layer of cloth masks. More research is needed to quantify longitudinal contamination of unwashed cloth masks over time and by usage frequency.

On a practical level, the difference in clinical outcomes in the trial may be explained by the fact the medical mask users received a new mask daily, whereas cloth mask users received 5 masks to wash and reuse. The principle of a re-usable cloth mask is that a user has at least two masks so they can be washed daily to ensure a clean mask each day. However, for medical mask users the simple fact of being provided a clean mask daily may be a key factor in reducing risk of infection, whereas busy health workers may forget to wash a cloth mask daily or wash them inadequately, as it is an added burden on their workload. We do not recommend cloth masks for health workers, but if used as a last resort where no other options are available, health facilities should provide clean masks daily to health workers, and also launder them in the hospital laundry. Placing the burden of cleaning on a HCW may increase the risk of unsafe use and infection. If laundry facilities are not available, using steam sterilisation may be a safer alternative to hand washing.<sup>5</sup>

A meta-analysis of mask use for SARS, SARS-CoV-2 and MERS CoV showed that masks were 85% protective, and that a 12-layered cloth mask is as protective as a medical mask.<sup>6</sup> There are no data on other combinations of layers, except that single layered masks are not protective.<sup>6</sup> Our original RCT suggests that even a two-layered cotton and cotton blend mask is not protective.<sup>2</sup> However, this

1  
2 does not preclude more protective cloth mask designs, especially if washing is done daily according  
3 to WHO recommendations.<sup>4</sup>  
4

5  
6 Cotton is not a suitable fabric for the outer layer of a mask, as it is absorbent, can become damp and  
7 pose a risk of contamination not washed daily or if washed inadequately.<sup>7</sup> The principles of a safer  
8 cloth mask would include at least three layers, water-resistant fabric for the outer layer, fine weave,  
9 high thread count, fit around the face and ties instead of ear loops, the latter which have been  
10 reported to reduce fit.<sup>8</sup> They should also be washed daily in soap and water, and the design should  
11 allow frequent washing without compromising the design features. The WHO changed it's  
12 recommendation on community mask use in June 2020 and provided guidance on optimal design of  
13 a cloth mask.<sup>9</sup>  
14

15  
16 The distribution of trial participants between ward types was similar, so this did not contribute to the  
17 poor performance of cloth masks. Further, infection rates were not significantly different by ward  
18 type for medical masks – only for cloth masks, which had a significantly higher infection risk for ICU  
19 and emergency wards. ICU and Emergency wards are recognised as high-risk, high transmission  
20 settings, with documented aerosolised viruses such as influenza and COVID-19,<sup>10,11,12</sup> so a cloth mask  
21 may not be adequate in these wards.  
22

23  
24 We conclude that two-layered cotton masks as used in the original RCT are not a safe option for HCW  
25 if they are held responsible for their own washing, especially in ICU or Emergency wards. A respirator  
26 provides 96% protection for health workers, compared to 67% with a medical mask,<sup>6</sup> and should be  
27 the standard for health workers treating COVID-19 patients.<sup>13</sup> This does not preclude the use of  
28 well-designed cloth masks in the community, as there has been unprecedented efforts in  
29 development and research into novel re-usable cloth masks during the pandemic.<sup>6</sup> However,  
30 countries should take responsibility for scaling up manufacturing of medical masks and respirators  
31 for health workers, instead of forcing them to work in sub-optimal personal protective equipment.<sup>14</sup>  
32

33  
34 In summary, the poor performance of cloth masks in our RCT may reflect inadequate washing. Daily  
35 washing of cloth masks at the recommended temperature of 60-90°C in whatever setting they are  
36 used, including the community, is essential for safety. Reports of self-washing may have over-  
37 estimated the frequency of washing and there may have been variability in the quality of washing.  
38 The additional burden of being responsible for cleaning of a mask for busy HCWs in the midst of a  
39 pandemic may compromise safety, if workers forget to wash the mask. Removing this responsibility  
40 from HCWs and minimising the burden on them for their own protection, by providing daily clean  
41 masks is the safest option in hospitals. If cloth masks are used, cleaning in the hospital laundry and  
42 daily provision of clean masks is safer than self-washing. The data from our RCT are specific to a two-  
43 layered cotton mask and cannot be generalised to all cloth masks. The trial was conducted in 2011,  
44 at a time when cloth masks were not well researched and not even mentioned in PPE guidelines  
45  
46  
47  
48  
49  
50  
51  
52  
53  
54  
55  
56  
57  
58  
59  
60

1  
2 despite being used widely in Asia. As a result of the COVID-19 pandemic, unprecedented research on  
3 cloth mask design is being conducted, which will result in better designs. Well-designed cloth masks  
4 may provide protection in the community,<sup>5,8</sup> but design is only one aspect of the safety and  
5 effectiveness of a cloth mask. Daily washing as recommended by the WHO is also necessary.  
6  
7  
8  
9  
10  
11  
12

13 **Author contributions:** CR MacIntyre conceived, designed study, developed data analysis plan, wrote  
14 the manuscript. B Rahman and AA Chughtai analysed the data and wrote and reviewed the  
15 manuscript. TC Dung reviewed original data and reviewed and wrote the manuscript. H Seale  
16 reviewed the analysis and wrote the manuscript.  
17  
18  
19

20 **Competing interests:** TC Dung works for the Vietnam Ministry of Health. There are no other  
21 competing interests.  
22  
23

24 **Data sharing:** The data are not available for sharing under the conditions of ethics approval from  
25 Vietnam.  
26  
27

28 **Funding:** C. Raina MacIntyre is supported by a NHMRC Principal Research Fellowship, grant number  
29 1137582. The original RCT was funded by the Australian Research Council.  
30  
31

32 **Acknowledgments:** We would like to acknowledge the participating hospitals and staff in Hanoi,  
33 Vietnam.  
34  
35  
36  
37

## 38 References

- 39 1. Centers for Disease Control and Prevention. Strategies for Optimizing the Supply of Facemasks.  
40 USA: CDC, 2020. [https://www.cdc.gov/coronavirus/2019-ncov/hcp/ppe-strategy/face-](https://www.cdc.gov/coronavirus/2019-ncov/hcp/ppe-strategy/face-masks.html)  
41 [masks.html](https://www.cdc.gov/coronavirus/2019-ncov/hcp/ppe-strategy/face-masks.html)  
42  
43
- 44 2. MacIntyre CR, Seale H, Dung TC, et al. A cluster randomised trial of cloth masks compared with  
45 medical masks in healthcare workers. *BMJ open* 2015;5(4):e006577-e77. doi:  
46 10.1136/bmjopen-2014-006577  
47  
48
- 49 3. Kleinbaum DGK, M. Survival Analysis. In: Mitchell GS, J.M., ed. Statistics for Biology and Health.  
50 Switzerland: Springer 2012: E book. ISSN: 1431-8776  
51 <https://www.springer.com/gp/book/9781441966452>  
52  
53
- 54 4. World Health Organization. 2020; Water, sanitation, hygiene, and waste management for the  
55 COVID-19 virus: interim guidance [https://www.who.int/publications/i/item/water-](https://www.who.int/publications/i/item/water-sanitation-hygiene-and-waste-management-for-covid-19)  
56 [sanitation-hygiene-and-waste-management-for-covid-19.](https://www.who.int/publications/i/item/water-sanitation-hygiene-and-waste-management-for-covid-19)  
57  
58  
59  
60

- 1  
2 5. Ma Q-X, Shan H, Zhang C-M, Zhang H-L, Li G-M, Yang R-M, et al. Decontamination of face masks  
3 with steam for mask reuse in fighting the pandemic COVID-19: Experimental supports.  
4 Journal of Medical Virology. 2020;n/a(n/a).  
5  
6  
7
- 8  
9 6. Chu DK, Akl EA, Duda S, et al. Physical distancing, face masks, and eye protection to prevent  
10 person-to-person transmission of SARS-CoV-2 and COVID-19: a systematic review and meta-  
11 analysis. *The Lancet*. 2020 doi: 10.1016/S0140-6736(20)31142-9  
12  
13
- 14 7. Chughtai AA, Seale H, Macintyre CR. Effectiveness of Cloth Masks for Protection Against Severe  
15 Acute Respiratory Syndrome Coronavirus 2. *Emerg Infect Dis*. 2020;26(10).  
16  
17
- 18  
19 8. MacIntyre CRC, A.A; Dung, C.T; Seale, H.S. Covid-19: Should cloth masks be used by healthcare  
20 workers as a last resort? *BMJ* 2020 [published Online First: April 9 2020]  
21 [https://blogs.bmj.com/bmj/2020/04/09/covid-19-should-cloth-masks-be-used-by-](https://blogs.bmj.com/bmj/2020/04/09/covid-19-should-cloth-masks-be-used-by-healthcare-workers-as-a-last-resort/)  
22 [healthcare-workers-as-a-last-resort/](https://blogs.bmj.com/bmj/2020/04/09/covid-19-should-cloth-masks-be-used-by-healthcare-workers-as-a-last-resort/)  
23  
24
- 25 9. World Health Organization. WHO. Coronavirus disease (COVID-19) advice for the public: When and  
26 how to use masks. Geneva, 2020: [https://www.who.int/emergencies/diseases/novel-](https://www.who.int/emergencies/diseases/novel-coronavirus-2019/advice-for-public/when-and-how-to-use-masks)  
27 [coronavirus-2019/advice-for-public/when-and-how-to-use-masks](https://www.who.int/emergencies/diseases/novel-coronavirus-2019/advice-for-public/when-and-how-to-use-masks).  
28  
29
- 30 10. Blachere, F. M., W. G. Lindsley, T. A. Pearce, S. E. Anderson, M. Fisher, R. Khakoo, B. J. Meade, O.  
31 Lander, S. Davis, R. E. Thewlis, I. Celik, B. T. Chen and D. H. Beezhold (2009). "Measurement  
32 of Airborne Influenza Virus in a Hospital Emergency Department." *Clinical Infectious Diseases*  
33 **48**(4): 438-440.  
34  
35
- 36 11. Santarpia, J. L., D. N. Rivera, V. Herrera, M. J. Morwitzer, H. Creager, G. W. Santarpia, K. K. Crown,  
37 D. Brett-Major, E. Schnaubelt, M. J. Broadhurst, J. V. Lawler, S. P. Reid and J. J. Lowe (2020).  
38 "Transmission Potential of SARS-CoV-2 in Viral Shedding Observed at the University of  
39 Nebraska Medical Center." medRxiv: 2020. DOI: 10.1101/2020.03.23.200394467.  
40  
41
- 42 12. Guo, Z. D. W., Z.Y; Zhang, S.F; L; et al (2020). "Aerosol and surface distribution of severe acute  
43 respiratory syndrome coronavirus 2 in hospital wards, Wuhan, China, 2020. *Emerg Infect Dis*.  
44 2020. DOI: <https://doi.org/10.3201/eid2607.200885>.  
45  
46
- 47 13. MacIntyre CR, Wang Q. Physical distancing, face masks, and eye protection for prevention of  
48 COVID-19. *The Lancet* 2020; Online first doi: 10.1016/S0140-6736(20)31183-1  
49  
50
- 51 14. Greenhalgh T, Schmid MB, Czypionka T, et al. - Face masks for the public during the covid-19  
52 crisis. – *BMJ*. 2020 Apr 09; 369:- m1435. doi: <https://doi.org/10.1136/bmj.m1435>  
53  
54  
55  
56  
57  
58  
59  
60



1  
2  
3  
4  
5  
6  
7  
8  
9  
10  
11  
12  
13  
14  
15  
16  
17  
18  
19  
20  
21  
22  
23  
24  
25  
26  
27  
28  
29  
30  
31  
32  
33  
34  
35  
36  
37  
38  
39  
40  
41  
42  
43  
44  
45  
46  
47  
48  
49  
50  
51  
52  
53  
54  
55  
56  
57  
58  
59  
60

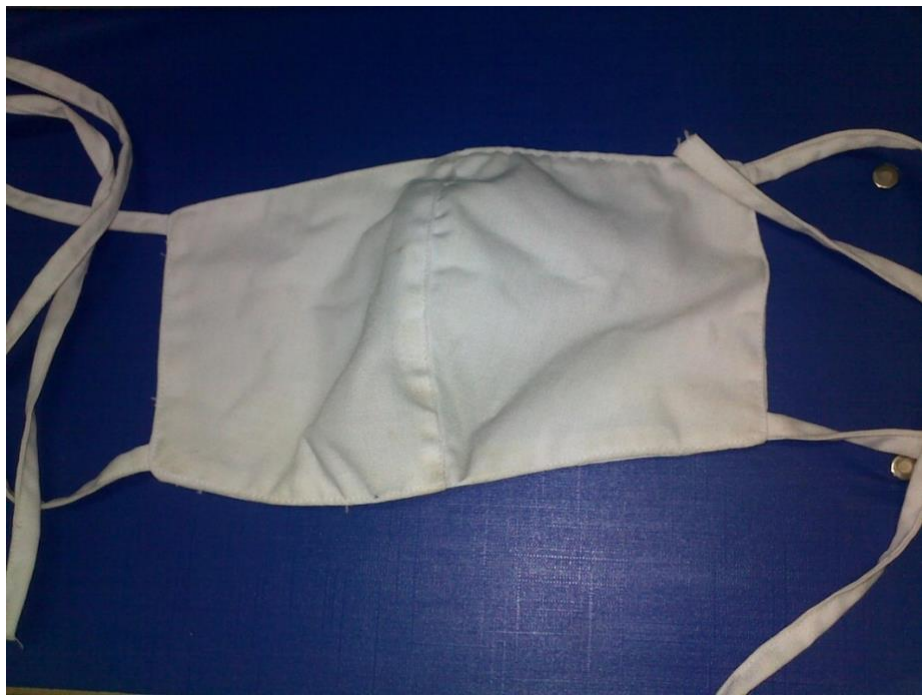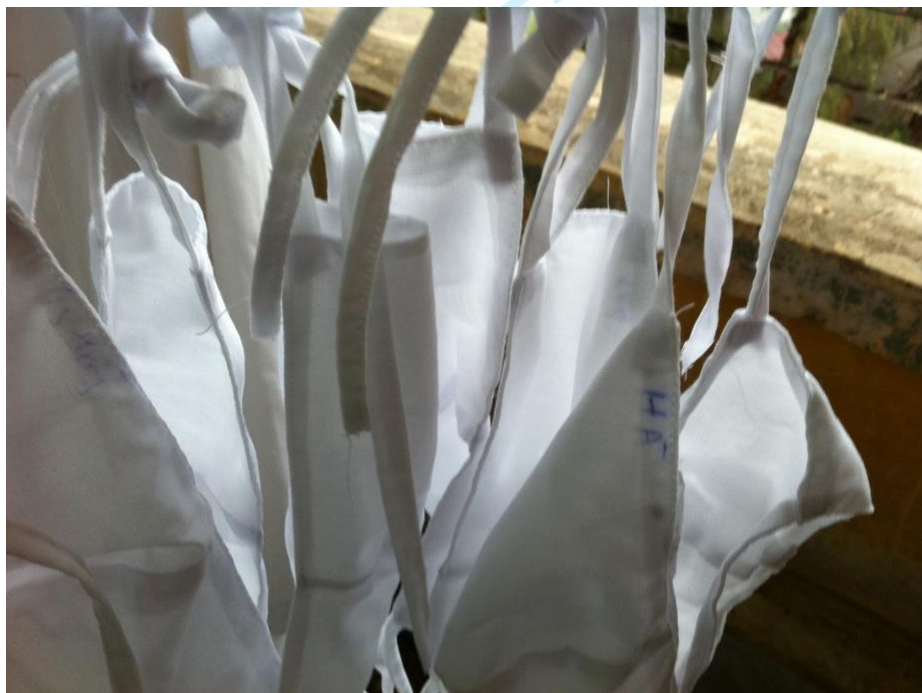

**Figure 1: Cloth mask used in the study and hanging of washed cloth masks to dry.**

Figure 2: Mask testing



1  
2  
3  
4  
5  
6  
7  
8  
9  
10  
11  
12  
13  
14  
15  
16  
17  
18  
19  
20  
21  
22  
23  
24  
25  
26  
27  
28  
29  
30  
31  
32  
33  
34  
35  
36  
37  
38  
39  
40  
41  
42  
43  
44  
45  
46  
47  
48  
49  
50  
51  
52  
53  
54  
55  
56  
57  
58  
59  
60

For peer review only

Figure 3. Survival analysis of infection by mask washing location (hospital laundry vs self-washing)



view only

## Research checklist

1. **Author information:** Yes
2. **Manuscript length and formatting:** Yes
3. **Tables:** No tables
4. **Figures:** Yes
5. **References:** Yes
6. **Supplementary files:** Yes
7. **Statements:** Have you included the necessary statements relating to [author contributorship](#), [competing interests and funding](#), [data sharing](#), [patient consent](#) and [ethical approval](#)? Yes
8. **Acknowledgements:** Have you acknowledged all contributors who do not meet the criteria for authorship? Have you acknowledged if your work has been previously presented at a conference/published as a conference abstract? Yes
9. **Suggested reviewers:** Have you [suggested reviewers](#) for your paper (if required by the journal)? Yes
10. **Research reporting checklists:** Have you either provided the [appropriate reporting guideline](#) for your study type, or explained why a checklist isn't required? Provided
11. **Reproducing figures:** Have you [obtained permission from the copyright holder](#) to re-use any previously published material? Has the source been acknowledged? N/A

# BMJ Open

## Contamination and washing of cloth masks and risk of infection among hospital health workers in Vietnam – a post-hoc analysis of a randomized controlled trial

|                                 |                                                                                                                                                                                                                                                                                                                                                                                                                                                                                                                   |
|---------------------------------|-------------------------------------------------------------------------------------------------------------------------------------------------------------------------------------------------------------------------------------------------------------------------------------------------------------------------------------------------------------------------------------------------------------------------------------------------------------------------------------------------------------------|
| Journal:                        | <i>BMJ Open</i>                                                                                                                                                                                                                                                                                                                                                                                                                                                                                                   |
| Manuscript ID                   | bmjopen-2020-042045.R2                                                                                                                                                                                                                                                                                                                                                                                                                                                                                            |
| Article Type:                   | Original research                                                                                                                                                                                                                                                                                                                                                                                                                                                                                                 |
| Date Submitted by the Author:   | 09-Aug-2020                                                                                                                                                                                                                                                                                                                                                                                                                                                                                                       |
| Complete List of Authors:       | MacIntyre, C Raina; University of New South Wales, The Kirby Institute; Arizona State University, College of Public Affairs and Community Solutions<br>Dung, Tham; Ministry of Health, Vietnam<br>Chughtai, Abrar; University of New South Wales, School of Public Health and Community Medicine<br>Seale, Holly; University of New South Wales, School of Public Health and Community Medicine<br>Rahman, Bayzidur; School of Public Health and Community Medicine, UNSW Medicine, University of New South Wales |
| <b>Primary Subject Heading</b>: | Infectious diseases                                                                                                                                                                                                                                                                                                                                                                                                                                                                                               |
| Secondary Subject Heading:      | Public health, Infectious diseases                                                                                                                                                                                                                                                                                                                                                                                                                                                                                |
| Keywords:                       | INFECTIOUS DISEASES, Infection control < INFECTIOUS DISEASES, Respiratory infections < THORACIC MEDICINE                                                                                                                                                                                                                                                                                                                                                                                                          |
|                                 |                                                                                                                                                                                                                                                                                                                                                                                                                                                                                                                   |

SCHOLARONE™  
Manuscripts



I, the Submitting Author has the right to grant and does grant on behalf of all authors of the Work (as defined in the below author licence), an exclusive licence and/or a non-exclusive licence for contributions from authors who are: i) UK Crown employees; ii) where BMJ has agreed a CC-BY licence shall apply, and/or iii) in accordance with the terms applicable for US Federal Government officers or employees acting as part of their official duties; on a worldwide, perpetual, irrevocable, royalty-free basis to BMJ Publishing Group Ltd ("BMJ") its licensees and where the relevant Journal is co-owned by BMJ to the co-owners of the Journal, to publish the Work in this journal and any other BMJ products and to exploit all rights, as set out in our [licence](#).

The Submitting Author accepts and understands that any supply made under these terms is made by BMJ to the Submitting Author unless you are acting as an employee on behalf of your employer or a postgraduate student of an affiliated institution which is paying any applicable article publishing charge ("APC") for Open Access articles. Where the Submitting Author wishes to make the Work available on an Open Access basis (and intends to pay the relevant APC), the terms of reuse of such Open Access shall be governed by a Creative Commons licence – details of these licences and which [Creative Commons](#) licence will apply to this Work are set out in our licence referred to above.

Other than as permitted in any relevant BMJ Author's Self Archiving Policies, I confirm this Work has not been accepted for publication elsewhere, is not being considered for publication elsewhere and does not duplicate material already published. I confirm all authors consent to publication of this Work and authorise the granting of this licence.

1  
2 **Contamination and washing of cloth masks and risk of infection among hospital health**  
3 **workers in Vietnam – a post-hoc analysis of a randomized controlled trial**  
4  
5  
6  
7

8 **Authors**

9 Chandini Raina MacIntyre(1)

10 Tham Chi Dung (2)

11 Abrar Ahmad Chughtai(3)

12 Holly Seale(3)

13 Md Bayzidur Rahman(3)

- 14  
15  
16  
17  
18  
19  
20  
21 1. Biosecurity Program, The Kirby Institute, UNSW Medicine, University of New South Wales,  
22 Australia  
23  
24 2. Ministry of Health, Vietnam  
25  
26 3. School of Public Health and Community Medicine, UNSW Medicine, University of New South  
27 Wales, Australia  
28  
29  
30  
31  
32

33 Corresponding author:

34 C Raina MacIntyre [rainam@protonmail.com](mailto:rainam@protonmail.com)  
35  
36  
37  
38  
39  
40  
41  
42  
43  
44  
45  
46  
47  
48  
49  
50  
51  
52  
53  
54  
55  
56  
57  
58  
59  
60



## Abstract

**Background:** In a previous randomised controlled trial in hospital health care workers (HCWs), cloth masks resulted in a higher risk of respiratory infections compared to medical masks. This was the only published RCT of cloth masks at the time of the COVID-19 pandemic.

**Objective:** to do a post-hoc analysis of unpublished data on mask washing and mask contamination from the original RCT to further understand poor performance of the two-layered cotton cloth mask used by health care workers in that RCT.

**Setting:** 14 secondary-level/tertiary-level hospitals in Hanoi, Vietnam.

**Participants:** A subgroup of 607 HCWs aged  $\geq 18$  years working full-time in selected high-risk wards, who used a two-layered cloth mask and were part of a randomised controlled clinical trial comparing medical masks and cloth masks.

**Intervention:** washing method for cloth masks (self-washing or hospital laundry). A sub-study of contamination of a sample of 15 cloth and medical masks was also conducted.

**Outcome measure:** infection rate over four weeks of follow up; and viral contamination of masks tested by multiplex PCR.

**Results:** Viral contamination with rhinovirus was identified on both used medical and cloth masks. Most HCW (77%) self-washed their masks by hand. The risk of infection was more than double among HCW self-washing their masks compared to the hospital laundry (hazards ratio 2.04 (95% CI: 1.03-4.00);  $p=0.04$ ). There was no significant difference in infection

1  
2 between HCW who wore cloth masks washed in the hospital laundry compared to medical  
3  
4 masks ( $p=0.5$ ).  
5

6 **Conclusions:** Using self-reported method of washing, we showed double the risk of infection with  
7  
8 seasonal respiratory viruses if masks were self-washed by hand by HCW. The majority of HCWs in the  
9  
10 study reported hand-washing their mask themselves. This could explain the poor performance of two  
11  
12 layered cloth masks, if the self-washing was inadequate. Cloth masks washed in the hospital laundry  
13  
14 were as protective as medical masks. Both cloth and medical masks were contaminated, but only  
15  
16 cloth masks were re-used in the study, reiterating the importance of daily washing of re-usable cloth  
17  
18 masks using proper method. A well washed cloth mask can be as protective as a medical mask.  
19  
20

21 Trial registration number in the Australian New Zealand Clinical Trials Registry was  
22  
23 ACTRN12610000887077  
24  
25  
26  
27

#### 28 **Strengths and limitations of this study**

- 29  
30 • Unpublished data on washing and contamination of the cloth masks was available for post-  
31  
32 hoc analysis of an original published RCT, which allowed further understand of reasons for  
33  
34 the poor performance of cloth masks in the RCT.
- 35 • The method and frequency of washing of cloth masks was self-reported by health workers,  
36  
37 which could be subject to recall bias or misreporting.
- 38 • The contamination study showed contamination of both medical and cloth masks but had a  
39  
40 small sample.
- 41 • The data are specific for the 2-layered cloth mask used in the study and do not preclude  
42  
43 better protection from a well-designed cloth mask which is washed daily.  
44  
45  
46  
47  
48  
49  
50  
51  
52  
53  
54  
55  
56  
57  
58  
59  
60

## Introduction

Global shortages of masks and respirators have resulted in agencies such as the US Centers for Disease Control (CDC) recommending cloth masks for health care workers (HCW) when disposable masks or respirators are not available.<sup>1</sup> We conducted the only randomised controlled clinical trial (RCT) of face masks available at the time of the COVID-19 pandemic, published in 2015.<sup>2</sup> This RCT showed that cloth masks resulted in a higher risk of infection than medical masks and also higher than the control arm. The rate of infection in the cloth mask arm was 1.67 times higher for laboratory confirmed viral illness and 13 times higher for clinical influenza-like illness.<sup>2</sup> In testing for water resistance, we also showed almost complete penetration of the cloth masks by sodium chloride droplets, more than double the penetration of medical masks. During the COVID-19 pandemic, where no medical grade mask was available, this RCT has raised concern about the safety of cloth masks as an alternative for HCWs.

In the RCT, over 90% of participants reported washing their masks daily.<sup>2</sup> On average, HCWs worked most days during the four-week trial period and reported washing their cloth masks on 92% of all days. They reported self-washing (80%), combined self-washing and hospital laundry (16%), and only hospital laundry (4%) as their method of washing.

We postulated that the poor performance of cloth masks may be due the design of the mask, which was a two-layered cotton mask manufactured in Vietnam, and possibly due to inadequate washing.<sup>2</sup> It was also possible that different distribution of cloth masks versus medical masks by ward type may have caused an apparently higher rate of infection in cloth mask users. Given the urgency around the safety of cloth masks and the controversy caused by the results of our RCT, we analysed unpublished data on cleaning of the cloth masks and ward allocation from the 2015 trial, as well as unpublished data from a sub-study on viral contamination of cloth and medical masks.

**Aims:** To determine the relationship of washing of masks to infection risk in cloth mask users. The secondary aim was to determine contamination with viral pathogens on the surface of cloth and medical masks.

## Methods:

We selected all subjects who wore a cloth mask from the published RCT of cloth masks versus medical masks<sup>2</sup> (trial registration number in the Australian New Zealand Clinical Trials Registry was ACTRN12610000887077), which included subjects allocated to the cloth mask arm (n=569) as well as anyone in the control arm wearing only a cloth mask (38/458). This provided 607 subjects for further analysis of infection risk by washing and cleaning of cloth masks. The cloth mask used in the study was manufactured locally in Vietnam, and widely used in the secondary hospitals and also in tertiary hospitals (see Figure 1 below). The cloth mask studied was made of cotton and cotton blend fabric with 2 layers (inner and outer layer), without a filter layer, and with four strings in four corners of the mask as pictured in Figure 1. HCWs were provided five masks and asked to wash their mask daily and use a clean one each day. They could hand-wash the masks themselves in the hospital with soap and tap water and hang them out to dry in a space provided for HCW (Figure 1), or they could get the masks laundered in the hospital laundry in an automatic washing machine with detergent and hot water, if available in their hospital. They were provided written instructions on washing the mask themselves and self-reported their washing practices daily. They re-used the masks after self-washing or using the hospital laundry system. The study was an epidemiologic analysis of unpublished data on contamination and washing of cloth masks, collected during the original RCT. We also looked at the distribution of HCW by ward type to see if there was any difference between the cloth and medical mask groups which could explain the higher rate of infection in the cloth mask group.

(Figure 1 here)

### Figure 1: Cloth mask used in the study

The outcome of interest was infection, using a composite outcome variable measured in the study (clinical respiratory illness, influenza like illness and laboratory confirmation of one or multiple respiratory viruses).<sup>2</sup> In the study, 85% (58/68 positive RT-PCR tests) were for Rhinovirus.<sup>2</sup>

The data on the method of washing (self-washing or hospital laundry) as well as daily diary data on frequency of washing were analysed. Self-reported daily cleaning data from daily diary cards were analysed, as participants may have varied the cleaning frequency and type by day over the four-week follow up period. Person-days of mask washing were used as

denominator data for analysis. Follow up data were censored when infection occurred. We compared cloth masks which were self-washed by hand, with cloth masks that were washed in the hospital laundry and medical masks. Data on ward type (Intensive Care, Infectious Diseases, Paediatrics, Cancer and Haematology, Emergency and other) cleaning method and frequency of cleaning were analysed against infection risk

### **Statistical analysis:**

To determine the association, we adopted a survival analysis technique with time varying covariates. The data was arranged in “counting process format”<sup>3</sup>, where for each participant there were same number of records as the number of days of follow up. The outcome and study factor (mask cleaning) were assessed daily as binary variables. We generated Kaplan - Meier survival plots to compare the survival experience by mask cleaning practices and fitted the Cox proportional hazards model to estimate the hazards ratios. We also examined infection rate by type of ward using a Pearson’s chi-squared test.

**Sub-study of contamination of masks:** A total of 117 masks samples were collected – 102 from subjects with clinical respiratory illness in participating hospitals; and 15 from a sub-study as described below. All participants at this time also had a swab of their nose and throat collected for lab testing.

For the sub-study of mask contamination, 15 mask samples were collected from two purposively selected wards in Thanh Nhan General Hospital (a city hospital in Hanoi) between 28 March -8 April 2011. Intervention arms were cluster randomized by ward, so staff on each ward used the same type of mask. Nine participants were randomly selected from the cloth mask group (Intensive Care Unit), and six were randomly selected from medical masks group (Pediatric ward). In the cloth mask group, three participants were given five clean cloth mask per person, along with daily washing instructions, and masks were collected after one month. Three participants were requested to provide their cloth masks for testing after use. The remaining three participants were asked to provide their cloth masks which they used for previous four weeks.

In the medical mask group, three randomly selected participants were given one new medical mask per person in morning by the study team and the masks were collected the

1  
2 same day after one hour of use. The remaining three participants were given one new  
3  
4 medical mask per person in morning and by the survey team and the masks were collected  
5  
6 after four hours of use.  
7  
8  
9

### 10 **Mask testing**

11  
12 The mask testing method is shown in Figure 2. Mask samples were collected after use by  
13  
14 HCWs. They were folded in double vertically. They were cut at the central part of the mask  
15  
16 into 3 x 5 cm rectangles and separated into different layers - three layers for medical masks  
17  
18 and two with cloth masks. Masks were cut and placed in a tube (as described in figure 2) and  
19  
20 sent to the lab for testing as described in the original study. <sup>2</sup> Each layer was put into  
21  
22 different VTM tube and labelled, using a sterilized bamboo stick to push the layer deep into  
23  
24 the media. Testing was performed using both normal and concentrated samples. A multiplex  
25  
26 respiratory viral RT-PCR test was done for SVA/B, Influenza A/H3N2, A/H1N1) and B viruses,  
27  
28 hMPV (reaction mix 1); Parainfluenza viruses 1–4 (reaction mix 2); Rhinoviruses, Influenza C  
29  
30 virus, SARS-CoV (reaction mix 3); Coronaviruses OC43, 229E, NL63 and HKU1 (reaction mix  
31  
32 4); and Adenoviruses and hBoV (reaction mix 5), as described in the original trial. <sup>2</sup>  
33  
34  
35  
36  
37  
38  
39  
40  
41  
42  
43  
44  
45  
46  
47  
48  
49  
50  
51  
52  
53  
54  
55  
56  
57  
58  
59  
60

1  
2  
3  
4  
5  
6  
7  
8  
9  
10  
11  
12  
13  
14  
15  
16  
17  
18  
19  
20  
21  
22  
23  
24  
25  
26  
27  
28  
29  
30  
31  
32  
33  
34  
35  
36  
37  
38  
39  
40  
41  
42  
43  
44  
45  
46  
47  
48  
49  
50  
51  
52  
53  
54  
55  
56  
57  
58  
59  
60

**Figure 2: Mask testing**

(Figure 2 here)

For peer review only

1  
2 Ethics approval for the study was granted by National Institute for Hygiene and Epidemiology (NIHE),  
3 Vietnam (approval number 05 IRB) and the Human Research Ethics Committee of the University of  
4 New South Wales (UNSW), Australia, (HREC approval number 10306).  
5  
6  
7  
8  
9

### 10 **Patient and Public Involvement**

11 There was no patient or public involvement.  
12  
13  
14  
15

### 16 **Results**

17  
18 There were 607 subjects with 9253 person-days of follow up who wore a cloth mask during the  
19 study. The highest rates of infection among cloth mask users was in the emergency (12%) and  
20 Intensive Care Units (10%). There was a similar distribution of participants between the ward types,  
21 in the medical mask and cloth mask arms with 138 medical mask users and 180 cloth mask users in  
22 ICU; and 163 medical mask users and 143 cloth mask users in the Emergency Department.  
23  
24  
25  
26

27 We also compared the infection rate of ICU and ED combined with other wards (paediatrics,  
28 infectious diseases, internal medicine, other). In the ICU and ED wards there were 36 (11.2%)  
29 infections among 323 cloth mask users and in all other wards there were 16 (5.6%) infections  
30 among 284 subjects. This difference was statistically significant ( $P=0.015$ ). There was no  
31 significant difference in infection rate between any ward types for medical masks, which was 5.33%  
32 overall (range 3.8-6.9%). In ICU, medical masks had 8/138 infections (5.8%) and in emergency 7/163  
33 (4.2%).  
34  
35  
36  
37  
38  
39

40 The most common method of cleaning was self-washing by hand (77%,) followed by hospital  
41 laundry (13%). Some HCW used both methods at different times. Over 90% (8396/9253  
42 person-day observations) reported washing their mask daily. Only 15 subjects reported  
43 cleaning their mask <50% of the time over the four weeks of follow up. There were  
44 7091/9253 person-days of self-washing reported, and 1177/9253 person-days of hospital  
45 laundry washing. Rates of infection among HCW who self-washed their cloth masks by hand  
46 and who used the hospital laundry were 2/100 person days (110/5417 person days) and 0.85  
47 per 100 person days (9/1052 person days) respectively. The rate of infection among HCW  
48 who wore a medical mask was 0.85 per 100 person days (139/16,284 person days). The risk  
49 of infection just over double for HCW who self-washed their cloth masks by hand compared to using  
50 the hospital laundry. The hazards ratio of infection for self-washing was 2.04 (95% CI: 1.03-4.00);  
51  
52  
53  
54  
55  
56  
57  
58  
59  
60  $p=0.04$ .



1  
2 There was no significant difference in infection rate between cloth masks washed in the  
3 hospital laundry and medical masks ( $p=0.5$ ). Figure 3 shows that hospital laundry was  
4 superior to self-washing in the survival analysis.  
5  
6  
7  
8  
9  
10  
11  
12  
13  
14  
15  
16  
17  
18  
19  
20  
21  
22  
23  
24  
25  
26  
27  
28  
29  
30  
31  
32  
33  
34  
35  
36  
37  
38  
39  
40  
41  
42  
43  
44  
45  
46  
47  
48  
49  
50  
51  
52  
53  
54  
55  
56  
57  
58  
59  
60

For peer review only

1  
2 **Figure 3. Survival analysis of infection by mask washing location (hospital laundry vs self-**  
3 **washing)**  
4

5  
6 (Figure 3 here)  
7  
8  
9

10 **Mask testing results:**  
11

12 In standard testing, 2% (2/117) of masks samples were positive for virus. Rhinoviruses were isolated  
13 from the internal layer and external layers respectively of one medical mask sample each.  
14

15  
16 In concentrated testing, around 4% (4/117 mask samples were positive, two medical masks and two  
17 cloth masks. Rhinoviruses were isolated from internal and external layers of two medical masks and  
18 only the internal layer of two cloth mask samples. Paired nose and throat swabs of these same  
19 subjects were also positive for Rhinoviruses.  
20  
21  
22  
23  
24  
25  
26  
27  
28  
29  
30  
31  
32  
33  
34  
35  
36  
37  
38  
39  
40  
41  
42  
43  
44  
45  
46  
47  
48  
49  
50  
51  
52  
53  
54  
55  
56  
57  
58  
59  
60

## Discussion

HCW whose cloth masks were laundered in the hospital laundry were protected as well as those who wore disposable medical masks, highlighting that a cloth mask can be protective if well washed. However, HCW who self-washed their masks in the hospital by hand had double the risk of infection than those who used the hospital laundry. Self-washing was by far the commonest method of washing (77% of cloth mask users), which could explain the poor performance of cloth masks in the intention to treat analysis in the original RCT, and reiterates the importance of daily washing of these products.<sup>2</sup>

While the majority of participants reported washing their mask daily, it appears that the hand washing was not adequate or that a proportion who reported daily washing did not actually do so every day. Hand washing in the hospital is usually done in the available wash basins, some of which do not have hot water, which may reduce the effectiveness of washing. This may have been an important factor in the poor performance of cloth masks in those who self-washed. The WHO recommends machine washing with warm water at 60–90°C and laundry detergent.<sup>4</sup>

We showed that both cloth and medical mask can become contaminated. There was no difference in contamination between medical and cloth masks - however, the sample size was very small. The majority of participants in the trial who had a confirmed viral infection had rhinovirus, and this was the only virus identified on mask samples, on both the inner and outer layers in medical masks and on the inner layer of cloth masks. More research is needed to quantify longitudinal contamination of unwashed cloth masks over time and by usage frequency.

On a practical level, the difference in clinical outcomes in the trial may be explained by the fact the medical mask users received a new mask daily, whereas cloth mask users received 5 masks to wash and reuse. The principle of a re-usable cloth mask is that a user has at least two masks so they can be washed daily to ensure a clean mask each day. However, for medical mask users the simple fact of being provided a clean mask daily may be a key factor in reducing risk of infection, whereas busy health workers may forget to wash a cloth mask daily or wash them inadequately, as it is an added burden on their workload. We do not recommend cloth masks for health workers, but if used as a last resort where no other options are available, health facilities should provide clean masks daily to health workers, and also launder them in the hospital laundry. Placing the burden of cleaning on a HCW may increase the risk of unsafe use and infection. If laundry facilities are not available, using steam sterilisation may be a safer alternative to hand washing.<sup>5</sup>

A meta-analysis of mask use for SARS, SARS-CoV-2 and MERS CoV showed that masks were 85% protective, and that a 12-layered cloth mask is as protective as a medical mask.<sup>6</sup> There are no data on other combinations of layers, except that single layered masks are not protective.<sup>6</sup> Our original

1  
2 RCT suggests that even a two-layered cotton and cotton blend mask is not protective.<sup>2</sup> However, this  
3 does not preclude more protective cloth mask designs, especially if washing is done daily according  
4 to WHO recommendations.<sup>4</sup>  
5  
6

7 Cotton is not a suitable fabric for the outer layer of a mask, as it is absorbent, can become damp and  
8 pose a risk of contamination not washed daily or if washed inadequately.<sup>7</sup> The principles of a safer  
9 cloth mask would include at least three layers, water-resistant fabric for the outer layer, fine weave,  
10 high thread count, fit around the face and ties instead of ear loops, the latter which have been  
11 reported to reduce fit.<sup>8</sup> They should also be washed daily in soap and water, and the design should  
12 allow frequent washing without compromising the design features. The WHO changed it's  
13 recommendation on community mask use in June 2020 and provided guidance on optimal design of  
14 a cloth mask.<sup>9</sup>  
15  
16  
17  
18  
19  
20

21 The distribution of trial participants between ward types was similar, so this did not contribute to the  
22 poor performance of cloth masks. Further, infection rates were not significantly different by ward  
23 type for medical masks – only for cloth masks, which had a significantly higher infection risk for ICU  
24 and emergency wards. ICU and Emergency wards are recognised as high-risk, high transmission  
25 settings, with documented aerosolised viruses such as influenza and COVID-19,<sup>10,11,12</sup> so a cloth mask  
26 may not be adequate in these wards.  
27  
28  
29  
30

31 We conclude that two-layered cotton masks as used in the original RCT are not a safe option for HCW  
32 if they are held responsible for their own washing, especially in ICU or Emergency wards. A respirator  
33 provides 96% protection for health workers, compared to 67% with a medical mask,<sup>6</sup> and should be  
34 the standard for health workers treating COVID-19 patients.<sup>13</sup> This does not preclude the use of  
35 well-designed cloth masks in the community, as there has been unprecedented efforts in  
36 development and research into novel re-usable cloth masks during the pandemic.<sup>6</sup> However,  
37 countries should take responsibility for scaling up manufacturing of medical masks and respirators  
38 for health workers, instead of forcing them to work in sub-optimal personal protective equipment.<sup>14</sup>  
39  
40  
41  
42  
43  
44  
45

46 In summary, the poor performance of cloth masks in our RCT may reflect inadequate washing. Daily  
47 washing of cloth masks at the recommended temperature of 60-90°C in whatever setting they are  
48 used, including the community, is essential for safety. Reports of self-washing may have over-  
49 estimated the frequency of washing and there may have been variability in the quality of washing.  
50 The additional burden of being responsible for cleaning of a mask for busy HCWs in the midst of a  
51 pandemic may compromise safety, if workers forget to wash the mask. Removing this responsibility  
52 from HCWs and minimising the burden on them for their own protection, by providing daily clean  
53 masks is the safest option in hospitals. If cloth masks are used, cleaning in the hospital laundry and  
54 daily provision of clean masks is safer than self-washing. The data from our RCT are specific to a two-  
55 layered cotton mask and cannot be generalised to all cloth masks. The trial was conducted in 2011,  
56  
57  
58  
59  
60

1  
2 at a time when cloth masks were not well researched and not even mentioned in PPE guidelines  
3 despite being used widely in Asia. As a result of the COVID-19 pandemic, unprecedented research on  
4 cloth mask design is being conducted, which will result in better designs. Well-designed cloth masks  
5 may provide protection in the community,<sup>5,8</sup> but design is only one aspect of the safety and  
6 effectiveness of a cloth mask. Daily washing as recommended by the WHO is also necessary. This  
7 study shows that a well-washed cloth mask is as protective as a medical mask.  
8  
9  
10  
11  
12  
13  
14  
15  
16

17 **Author contributions:** CR MacIntyre conceived, designed study, developed data analysis plan, wrote  
18 the manuscript. B Rahman and AA Chughtai analysed the data and wrote and reviewed the  
19 manuscript. TC Dung reviewed original data and reviewed and wrote the manuscript. H Seale  
20 reviewed the analysis and wrote the manuscript.  
21  
22

23 **Competing interests:** TC Dung works for the Vietnam Ministry of Health. There are no other  
24 competing interests.  
25  
26

27 **Data sharing:** The data are not available for sharing under the conditions of ethics approval from  
28 Vietnam.  
29  
30

31 **Funding:** C. Raina MacIntyre is supported by a NHMRC Principal Research Fellowship, grant number  
32 1137582. The original RCT was funded by the Australian Research Council.  
33  
34

35 **Acknowledgments:** We would like to acknowledge the participating hospitals and staff in Hanoi,  
36 Vietnam.  
37  
38  
39  
40

## 41 **References**

- 42 1. Centers for Disease Control and Prevention. Strategies for Optimizing the Supply of Facemasks.  
43 USA: CDC, 2020. [https://www.cdc.gov/coronavirus/2019-ncov/hcp/ppe-strategy/face-](https://www.cdc.gov/coronavirus/2019-ncov/hcp/ppe-strategy/face-masks.html)  
44 [masks.html](https://www.cdc.gov/coronavirus/2019-ncov/hcp/ppe-strategy/face-masks.html)  
45  
46
- 47 2. MacIntyre CR, Seale H, Dung TC, et al. A cluster randomised trial of cloth masks compared with  
48 medical masks in healthcare workers. *BMJ open* 2015;5(4):e006577-e77. doi:  
49 [10.1136/bmjopen-2014-006577](https://doi.org/10.1136/bmjopen-2014-006577)  
50  
51
- 52 3. Kleinbaum DGK, M. Survival Analysis. In: Mitchell GS, J.M., ed. Statistics for Biology and Health.  
53 Switzerland: Springer 2012: E book. ISSN: 1431-8776  
54 <https://www.springer.com/gp/book/9781441966452>  
55  
56  
57  
58  
59  
60

- 1  
2  
3  
4  
5  
6  
7  
8  
9  
10  
11  
12  
13  
14  
15  
16  
17  
18  
19  
20  
21  
22  
23  
24  
25  
26  
27  
28  
29  
30  
31  
32  
33  
34  
35  
36  
37  
38  
39  
40  
41  
42  
43  
44  
45  
46  
47  
48  
49  
50  
51  
52  
53  
54  
55  
56  
57  
58  
59  
60
4. World Health Organization. 2020; Water, sanitation, hygiene, and waste management for the COVID-19 virus: interim guidance <https://www.who.int/publications/i/item/water-sanitation-hygiene-and-waste-management-for-covid-19>.
5. Ma Q-X, Shan H, Zhang C-M, Zhang H-L, Li G-M, Yang R-M, et al. Decontamination of face masks with steam for mask reuse in fighting the pandemic COVID-19: Experimental supports. *Journal of Medical Virology*. 2020;n/a(n/a).
6. Chu DK, Akl EA, Duda S, et al. Physical distancing, face masks, and eye protection to prevent person-to-person transmission of SARS-CoV-2 and COVID-19: a systematic review and meta-analysis. *The Lancet*. 2020 doi: 10.1016/S0140-6736(20)31142-9
7. Chughtai AA, Seale H, Macintyre CR. Effectiveness of Cloth Masks for Protection Against Severe Acute Respiratory Syndrome Coronavirus 2. *Emerg Infect Dis*. 2020;26(10).
8. MacIntyre CRC, A.A.; Dung, C.T; Seale, H.S. Covid-19: Should cloth masks be used by healthcare workers as a last resort? *BMJ* 2020 [published Online First: April 9 2020] <https://blogs.bmj.com/bmj/2020/04/09/covid-19-should-cloth-masks-be-used-by-healthcare-workers-as-a-last-resort/>
9. World Health Organization. WHO. Coronavirus disease (COVID-19) advice for the public: When and how to use masks. Geneva, 2020: <https://www.who.int/emergencies/diseases/novel-coronavirus-2019/advice-for-public/when-and-how-to-use-masks>.
10. Blachere, F. M., W. G. Lindsley, T. A. Pearce, S. E. Anderson, M. Fisher, R. Khakoo, B. J. Meade, O. Lander, S. Davis, R. E. Thewlis, I. Celik, B. T. Chen and D. H. Beezhold (2009). "Measurement of Airborne Influenza Virus in a Hospital Emergency Department." *Clinical Infectious Diseases* **48**(4): 438-440.
11. Santarpia, J. L., D. N. Rivera, V. Herrera, M. J. Morwitzer, H. Creager, G. W. Santarpia, K. K. Crown, D. Brett-Major, E. Schnaubelt, M. J. Broadhurst, J. V. Lawler, S. P. Reid and J. J. Lowe (2020). "Transmission Potential of SARS-CoV-2 in Viral Shedding Observed at the University of Nebraska Medical Center." medRxiv: 2020. DOI: 10.1101/2020.03.23.200394467.
12. Guo, Z. D. W., Z.Y; Zhang, S.F; L; et al (2020). "Aerosol and surface distribution of severe acute respiratory syndrome coronavirus 2 in hospital wards, Wuhan, China, 2020. *Emerg Infect Dis*. 2020. DOI: <https://doi.org/10.3201/eid2607.200885>.
13. MacIntyre CR, Wang Q. Physical distancing, face masks, and eye protection for prevention of COVID-19. *The Lancet* 2020; Online first doi: 10.1016/S0140-6736(20)31183-1
14. Greenhalgh T, Schmid MB, Czypionka T, et al. - Face masks for the public during the covid-19 crisis. – *BMJ*. 2020 Apr 09; 369:- m1435. doi: <https://doi.org/10.1136/bmj.m1435>

1  
2  
3  
4  
5  
6  
7  
8  
9  
10  
11  
12  
13  
14  
15  
16  
17  
18  
19  
20  
21  
22  
23  
24  
25  
26  
27  
28  
29  
30  
31  
32  
33  
34  
35  
36  
37  
38  
39  
40  
41  
42  
43  
44  
45  
46  
47  
48  
49  
50  
51  
52  
53  
54  
55  
56  
57  
58  
59  
60



**Figure 1: Cloth mask used in the study and hanging of washed cloth masks to dry.**



Figure 2: Mask testing





1  
2  
3  
4  
5  
6  
7  
8  
9  
10  
11  
12  
13  
14  
15  
16  
17  
18  
19  
20  
21  
22  
23  
24  
25  
26  
27  
28  
29  
30  
31  
32  
33  
34  
35  
36  
37  
38  
39  
40  
41  
42  
43  
44  
45  
46  
47  
48  
49  
50  
51  
52  
53  
54  
55  
56  
57  
58  
59  
60

For peer review only

Figure 3. Survival analysis of infection by mask washing location (hospital laundry vs self-washing)



view only

## Research checklist

1. **Author information:** Yes
2. **Manuscript length and formatting:** Yes
3. **Tables:** No tables
4. **Figures:** Yes
5. **References:** Yes
6. **Supplementary files:** Yes
7. **Statements:** Have you included the necessary statements relating to [author contributorship](#), [competing interests and funding](#), [data sharing](#), [patient consent](#) and [ethical approval](#)? Yes
8. **Acknowledgements:** Have you acknowledged all contributors who do not meet the criteria for authorship? Have you acknowledged if your work has been previously presented at a conference/published as a conference abstract? Yes
9. **Suggested reviewers:** Have you [suggested reviewers](#) for your paper (if required by the journal)? Yes
10. **Research reporting checklists:** Have you either provided the [appropriate reporting guideline](#) for your study type, or explained why a checklist isn't required? Provided
11. **Reproducing figures:** Have you [obtained permission from the copyright holder](#) to re-use any previously published material? Has the source been acknowledged? N/A
